1 **Pptc7 is an essential phosphatase for promoting mammalian**  
2 **mitochondrial metabolism and biogenesis**

3 Natalie M. Niemi<sup>1,2</sup>, Gary M. Wilson<sup>3</sup>, Katherine A. Overmyer<sup>1,4</sup>, F.-Nora Vögtle<sup>5</sup>,  
4 Danielle C. Lohman<sup>1</sup>, Kathryn L. Schueler<sup>2</sup>, Alan D. Attie<sup>2</sup>, Chris Meisinger<sup>5,6</sup>, Joshua J. Coon<sup>1,3,4,7</sup>,  
5 & David J. Pagliarini<sup>1,2,\*</sup>

6  
7 <sup>1</sup>Morgridge Institute for Research, Madison, Wisconsin, USA.

8 <sup>2</sup>Department of Biochemistry, University of Wisconsin–Madison, Madison, Wisconsin, USA.

9 <sup>3</sup>Department of Chemistry, University of Wisconsin–Madison, Madison, Wisconsin, USA.

10 <sup>4</sup>Genome Center of Wisconsin, Madison, Wisconsin, USA.

11 <sup>5</sup>Institute of Biochemistry and Molecular Biology, ZBMZ, Faculty of Medicine, University of  
12 Freiburg, Freiburg im Breisgau, Germany.

13 <sup>6</sup>BIOSS Centre for Biological Signalling Studies, University of Freiburg, Freiburg im Breisgau,  
14 Germany.

15 <sup>7</sup>Department of Biomolecular Chemistry, University of Wisconsin–Madison, Madison, Wisconsin,  
16 USA.

17

18 \*Correspondence should be addressed to D.J.P. (dpagliarini@morgridge.org)

19 **SUMMARY**

20 Mitochondrial proteins are replete with phosphorylation; however, the origin, abundance, and  
21 functional relevance of these modifications are largely unclear. Nonetheless, mitochondria  
22 possess multiple resident phosphatases, suggesting that protein dephosphorylation may be  
23 broadly important for mitochondrial activities. To explore this, we deleted the poorly characterized  
24 matrix phosphatase *Pptc7* from mice using CRISPR-Cas9 technology. Strikingly, *Pptc7*<sup>-/-</sup> mice  
25 exhibited marked hypoketotic hypoglycemia, elevated acylcarnitines, and lactic acidosis, and died  
26 soon after birth. *Pptc7*<sup>-/-</sup> tissues had significantly diminished mitochondrial size and protein content  
27 despite normal transcript levels, but consistently elevated phosphorylation on select mitochondrial  
28 proteins. These putative *Pptc7* substrates include the protein translocase complex subunit  
29 Timm50, whose phosphorylation reduced import activity. We further find that phosphorylation in  
30 or near the mitochondrial targeting sequences of multiple proteins can disrupt their import rates  
31 and matrix processing. Overall, our data define *Pptc7* as a protein phosphatase essential for  
32 proper mitochondrial function and biogenesis during the extrauterine transition.

33

34

35 Mitochondria are multifaceted organelles required for metabolic and signaling processes within  
36 almost every eukaryotic cell type<sup>1</sup>. Beyond their production of ATP through oxidative  
37 phosphorylation, mitochondria play key roles in macromolecular biosynthesis, ion homeostasis,  
38 redox signaling, and apoptotic cell death — activities that must be calibrated to changing cellular  
39 needs. Recent investigations suggest that these and other mitochondrial functions may be  
40 affected by post-translational modifications (PTMs), such as phosphorylation<sup>2,3</sup> and acylation<sup>4,5</sup>.  
41 These PTMs are found on hundreds of mitochondrial proteins<sup>6,7</sup>, and can alter enzyme function<sup>6</sup>,  
42 complex assembly<sup>8</sup>, and metabolic flux<sup>9,10</sup>. However, other studies suggest that these  
43 mitochondrial PTMs can arise non-enzymatically<sup>11,12</sup> and are often found at low stoichiometry<sup>2,13-</sup>  
44 <sup>15</sup>, calling into question whether and to what extent these modifications exert regulatory functions.

45 Although much remains to be established about the overall nature and importance of  
46 reversible phosphorylation in mitochondria, it is clear that these organelles possess a number of  
47 resident phosphatases<sup>16-18</sup>. For example, it has long been known that the pyruvate  
48 dehydrogenase<sup>9</sup> and branched chain ketoacid dehydrogenase complexes<sup>19</sup> include bound  
49 phosphatases (and kinases) that regulate their activities. However, beyond these, there exist  
50 other poorly characterized mitochondrial proteins that possess known or predicted protein  
51 phosphatase domains<sup>16-18</sup>, suggesting that protein dephosphorylation may be of more widespread  
52 importance in mitochondria than is currently appreciated. To begin exploring this, we recently  
53 analyzed three *S. cerevisiae* mitochondrial phosphatase deletion strains ( $\Delta ptc5$ ,  $\Delta ptc6$ , and  
54  $\Delta ptc7$ )<sup>18</sup> and identified phenotypes and putative substrates unique to each. In particular, we found  
55 that  $\Delta ptc7$  exhibited a significant respiratory deficiency concomitant with elevated phosphorylation  
56 on a diverse set of proteins in the matrix where Ptc7p resides<sup>17</sup>. Ptc7p has also been associated  
57 with the maintenance of coenzyme Q levels<sup>20,21</sup>.

58 Here, to further explore the function of this phosphatase, we used CRISPR-Cas9 to  
59 generate a global knockout of the *PTC7* ortholog *Pptc7* in *Mus musculus*. We find that *Pptc7*<sup>-/-</sup>  
60 mice are born at the expected Mendelian frequency, but exhibit severe metabolic phenotypes and

61 die within one day of their birth. Consistent with our findings in yeast, proteomic and  
62 phosphoproteomic analyses suggest that *Pptc7* influences numerous mitochondrial processes,  
63 and that its loss causes post-transcriptional downregulation of mitochondrial content and disrupts  
64 key metabolic shifts required for a successful extrauterine transition. Furthermore, our data  
65 suggest that *Pptc7* influences mitochondrial protein import and processing via two mechanisms:  
66 through dephosphorylation of the mitochondrial import complex protein Timm50, and via  
67 dephosphorylation of residues within or proximal to the targeting sequences of various imported  
68 proteins. Collectively, our data argue that proper management of mitochondrial protein  
69 phosphorylation is of vital importance to mammalian metabolism and development.

70

## 71 RESULTS

### 72 Global knockout of *Pptc7* causes perinatal lethality

73 We generated a CRISPR-mediated global knockout of *Pptc7* in *Mus musculus*. Exons 2 (E2) and  
74 3 (E3) were targeted simultaneously (Figure 1A), generating a founder mouse carrying indels in  
75 each region (Figure S1A). Each indel caused a frameshift that negated key catalytic residues and  
76 truncated the protein, and thus generated *bona fide* null alleles (Figure S1B). Upon breeding, the  
77 founder produced F1 progeny each carrying only one of the indels, thereby generating two  
78 independent *Pptc7*-null lines (Figure 1B). This inheritance pattern indicated that the founder  
79 mouse was compound heterozygous (null) for *Pptc7*, yet this mouse showed no overt  
80 morphological or metabolic abnormalities for ~18 months (data not shown).

81 We interbred *Pptc7*<sup>+/-</sup> mice from both lines and genotyped their progeny, but found no  
82 *Pptc7*<sup>-/-</sup> (KO) mice in the weaned pups (n=130). This observation suggests that CRISPR-mediated  
83 loss of *Pptc7* via either indel causes lethality that is not due to off-target effects (Figures 1C, S1C-  
84 E). We found that pups of all genotypes are born at Mendelian frequencies (Figure 1D, S1F-H),  
85 but fail to survive after birth (Figure 1D), indicating that KO pups develop appropriately *in utero*  
86 but cannot survive the perinatal transition.

87           The full penetrance of perinatal lethality in the *Pptc7* knockout pups led us to investigate  
88 how the founder mouse, who was compound heterozygous for *Pptc7*, survived. CRISPR-  
89 generated mice are often mosaic<sup>22</sup>, suggesting that the founder may have expressed a non-  
90 Mendelian ratio of wild type and null alleles in its somatic tissues. To test this, we performed next  
91 generation sequencing (Figure S1) and found skewed allele frequencies in all tissues examined  
92 from the founder (Figure S1J-P), while F1 progeny had expected allele frequencies (Figure S1Q-  
93 T). Notably, the founder had a substantial percentage of wild type alleles (Figure 1E), which likely  
94 contributed to survival. Collectively, these data demonstrate that *Pptc7* expression is required for  
95 survival of the extrauterine transition in mice, and that CRISPR-Cas9 associated mosaicism  
96 serendipitously enabled survival of the founder mouse and germline transmission of knockout  
97 alleles for an essential gene.

98

### 99 ***Pptc7*-null mice have defects associated with inborn errors of metabolism**

100 During birth, mammals transition from a primarily glycolytic metabolism *in utero* to a reliance on  
101 lipid- and protein-rich milk as a nutrient source<sup>23,24</sup>. As such, deficiency in metabolic processes  
102 including glycogen mobilization<sup>25</sup>, fatty acid oxidation<sup>26</sup>, and ketone body utilization<sup>27</sup> can lead to  
103 perinatal lethality. We profiled these and other metabolic phenotypes to assess their potential  
104 contribution to the early *Pptc7*<sup>-/-</sup> lethality. *Pptc7* KO pups (Figure 2A, Figure S2A-C) and E14.5  
105 embryos (Figure S2D) weighed significantly less than their WT counterparts. *Pptc7* KO pups were  
106 also hypoglycemic (Figure 2B), with a median blood glucose of 41 mg/dl relative to 71 mg/dl for  
107 WT pups. Insulin levels were unchanged in KO relative to WT pups (Figure 2C), suggesting that  
108 their hypoglycemia may alternatively have arisen through impaired gluconeogenesis and/or  
109 increased glycolytic flux. Consistently, KO pups displayed lactic acidosis (Figure 2D), which is  
110 commonly associated with mitochondrial dysfunction<sup>28</sup>. Finally, KO mice were hypoketotic, with a  
111 ~3.5-fold decrease in serum ketones relative to their WT littermates (Figure 2E), and analysis of

112 matched glucose and ketone levels across mice demonstrates hypoketotic hypoglycemia (Figure  
113 S2E).

114 Hypoketotic hypoglycemia is typically associated with defects in fatty acid oxidation  
115 (FAO)<sup>29,30</sup>, but can also occur with more generalized mitochondrial defects, such as mtDNA loss<sup>31</sup>.  
116 To further explore the underlying cause of this phenotype, we examined metabolites and  
117 acylcarnitines in tissues isolated from newborn WT and KO pups. Consistent with the low blood  
118 sugar and lactic acidosis seen in knockout serum, metabolomic analysis of liver tissue revealed  
119 decreased glucose levels concomitant with increased pyruvate and lactate levels (Figure 2F),  
120 suggesting a defect in gluconeogenesis (Figures 2B, D). This analysis also revealed a substantial  
121 increase in amino acids whose catabolism occurs within mitochondria, such as branched chain  
122 amino acids (BCAAs), in both liver (Figure 2G) and heart (Figure S2F). These data were  
123 corroborated via acylcarnitine analysis, as byproducts of BCAA catabolism were all significantly  
124 elevated in *Pptc7* knockout liver (Figure 2H, S2H) and heart (Figure S2G, S2I). These  
125 acylcarnitine data also suggest widespread defects in FAO, as medium and long chain  
126 acylcarnitines were significantly increased in *Pptc7* KO liver and heart tissues, and short chain  
127 acylcarnitines levels were increased in heart (Figures 2H, S2G, S2I).

128 To our knowledge, these *Pptc7* KO-associated metabolic abnormalities are not consistent  
129 with any single inborn error of metabolism, but rather share molecular characteristic with various  
130 disorders. For instance, glutaric aciduria type II (GAI) has substantial overlap with *Pptc7* KO  
131 presentation (hypoketotic hypoglycemia, lactic acidosis, and elevation of multiple  
132 acylcarnitines)<sup>32</sup>, yet key distinctions remain (e.g. levels of  $\alpha$ -amino adipic acid, a lysine catabolite,  
133 are typically increased in GAI instead of decreased, as is seen in the *Pptc7* KO)<sup>32</sup>. In this way,  
134 the pleiotropic effects of *Pptc7* disruption on FAO might be most analogous to the established  
135 paradigm of “synergistic heterozygosity,” in which combined heterozygous defects in distinct FAO  
136 enzymes is sufficient to produce a metabolic phenotype<sup>33</sup>. Overall, these data suggest that *Pptc7*

137 function likely influences multiple metabolic pathways, and that its expression is required for the  
138 use of multiple nutrients in the perinatal stage.

139

#### 140 **Loss of *Pptc7* causes a post-transcriptional defect in mitochondrial biogenesis**

141 To profile the molecular consequences of *Pptc7* loss, we performed quantitative proteomics on  
142 tissues from WT and KO littermates. These results showed no clear pattern of changes in non-  
143 mitochondrial proteins for either heart (Figure 3A, S2A) or liver (Figure 3B, S2B), but revealed a  
144 widespread decrease of mitochondrial proteins in both tissues (Figures 3C, D, S2A, S2B). These  
145 data were corroborated by Western blots of proteins involved in oxidative phosphorylation, which  
146 were decreased only in KO heart and liver tissues (Figure S3C, S3D). Notably, *Bnip3* – a stress-  
147 activated protein involved in mitophagy<sup>34</sup> – is elevated in KO tissue, suggesting that mitophagy  
148 might play a role in these decreased protein levels. Importantly, nuclear-encoded mitochondrial  
149 mRNA transcripts were not decreased (other than the CRISPR-targeted *Pptc7*) (Figure 3E),  
150 suggesting that disruption of mitochondrial protein homeostasis in *Pptc7*-null tissues occurs post-  
151 transcriptionally.

152 To further examine how this loss of mitochondrial proteins is manifest at the cellular level,  
153 we performed electron microscopy of tissue slices from P0 mice. In both heart (Figure 3F, G) and  
154 liver (Figure 3I, J) mitochondria from KO mice were significantly smaller than those from WT mice.  
155 On average, mitochondria from KO mice had ~40% (Figure 3H) and ~34% (Figure 3K) of the  
156 surface area of WT mice in heart and liver, respectively. As such, certain mitochondrial defects  
157 that we observe in KO tissues, such as decreased citrate synthase activity (Figure S3E, F) and  
158 coenzyme Q levels (Figure S3G, H), likely stem from the overall reduction in mitochondrial  
159 content, and not from protein-level regulation; in each case, these changes are no longer apparent  
160 when normalized to total mitochondrial protein content (Figure S3E-H). To determine putative  
161 *Pptc7* substrates whose dysregulation might contribute to these global mitochondrial effects, we  
162 next performed phosphoproteomic analysis of WT and KO tissues.

163

## 164 **Phosphoproteomic analysis of *Pptc7*<sup>-/-</sup> mice reveals candidate substrates**

165 We previously demonstrated that deletion of the yeast ortholog of Pptc7 (termed Ptc7p) caused  
166 mitochondrial dysfunction concomitant with elevated phosphorylation on a range of proteins<sup>17</sup>.  
167 These results suggest that this phosphatase likely has multiple substrates. We similarly assessed  
168 putative substrates for Pptc7 using quantitative multiplexed phosphoproteomic analysis of  
169 littermate-matched WT and KO heart and liver tissues (Figure 4A). Analogous to  $\Delta ptc7$  yeast, we  
170 find that 28% of mitochondrial phosphorylation events are altered between WT and KO tissues,  
171 compared to only 4% of non-mitochondrial phosphoisoforms (Figure S4A). Of mitochondrial  
172 phosphoisoforms changing by  $\geq 1.5$  fold, 98% are elevated (Figure S4B), consistent with the  
173 expected outcome of disrupting a mitochondria-specific phosphatase. In heart, 21 mitochondrial  
174 phosphoisoforms were elevated by  $\geq 1.5$ -fold with a  $p$ -value of  $< 0.05$  (Figure 4B, Table 1), seven  
175 of which had a Benjamini-Hochberg multiple hypothesis-adjusted  $q$ -value  $< 0.05$  (Figure 4C).  
176 Similarly, liver exhibited 28 (Figure 4D, Table 1), and eight (Figure 4E) phosphoisoforms meeting  
177 these same respective criteria.

178 Mitochondrial phosphoisoforms elevated in *Pptc7* KO tissues spanned numerous  
179 pathways (Table 1), including mitochondrial RNA processing and translation (Mrpl30, Mrps26,  
180 Lrpprc, and Supv3l1) (Figure S4C), the TCA cycle (Idh2, Aco2, and Cs) (Figure S4D), and fatty  
181 acid oxidation (Hadh and EtfA) (Figure S4E). Notably, we identified overlap between a subset of  
182 these elevated phosphoproteins and those found in  $\Delta ptc7$  yeast<sup>17,18</sup> (Table 1), suggesting that  
183 select phosphatase functions are conserved. This broad profile of phosphoproteins is consistent  
184 with Pptc7 affecting diverse proteins and pathways, and suggests that it likely influences multiple  
185 processes within mitochondria.

186

## 187 **Pptc7-mediated modulation of Timm50 function is conserved through *S. cerevisiae***



188 We next sought to identify candidate *Pptc7* substrates from our analyses above whose  
189 dysregulation could give rise to the marked mitochondrial dysregulation we observe in the KO  
190 mice. Timm50 is among the most significantly elevated phosphoproteins in *Pptc7* KO tissues, and  
191 its identification in both *PTC7* knockout yeast<sup>17</sup> and our previous study of obese mice<sup>6</sup> (Table 1)  
192 suggests that this phosphorylation may have functional relevance under multiple conditions. The  
193 phosphorylation site on Timm50 (Tim50p in yeast) occurs on the matrix-facing N-terminal tail in  
194 both the yeast and mouse orthologs (Figure 5A). Although *Timm50* is essential in both *S.*  
195 *cerevisiae*<sup>35</sup> and *M. musculus*<sup>36</sup>, we hypothesized that a less severe disruption of  
196 Tim50p/Timm50-mediated protein import activity could generate many of the pleiotropic effects  
197 seen in  $\Delta ptc7$  yeast and *Pptc7* KO mice. Indeed, a recent study identified compound  
198 heterozygous mutations in *TIMM50* in a patient with a mitochondrial disorder whose tissues  
199 exhibited a similar decrease in respiratory chain components as our *Pptc7* KO mice<sup>37</sup>.

200 To test whether Tim50p phosphorylation affects mitochondrial protein import, we  
201 generated a strain of yeast expressing WT Tim50p, or a non-phosphorylatable (S104A) or  
202 phosphomimetic (S104E) FLAG-tagged mutant (Figure 5B). As *TIM50* is essential, we used a  
203 previously characterized strain expressing the endogenous *TIM50* gene under a galactose-  
204 inducible promoter (*GAL7*)<sup>38</sup>, which reduces growth on non-fermentable carbon sources in the  
205 absence of galactose (Figure S5A). This phenotype could be rescued fully by exogenous  
206 expression of Tim50p (Figure S5A) and Tim50p S104A (Figure S5A), while expression of the  
207 phosphomimetic mutant Tim50p S104E exhibited a slight growth defect (Figure S5B). To test  
208 whether Tim50p phosphorylation affects import efficiency, we performed import assays using  
209 recombinant cytochrome  $b_2$ -(167) $\Delta_{19}$ -DHFR—a well-established, matrix-targeted model  
210 substrate<sup>39</sup>—into mitochondria isolated from strains expressing WT Tim50p or a non-  
211 phosphorylatable S104A or phosphomimetic S104E mutant. Mitochondria expressing Tim50p  
212 with mutant S104 had import defects, with Tim50p S104E mitochondria importing cytochrome  $b_2$ -

213 (167)<sub>Δ19</sub>-DHFR almost three-fold less efficiently than WT (Figure 5C, quantified in D). These data  
214 suggest that phosphorylation at this site can inhibit mitochondrial protein import.

215         Given the elevation of Tim50p S104 phosphorylation in  $\Delta ptc7$  yeast<sup>17</sup>, we next tested  
216 mitochondrial protein import in  $\Delta ptc7$  yeast and likewise found an approximate three-fold  
217 decrease relative to WT import rates (Figure 5E, quantified in F).  $\Delta ptc7$  yeast do not have  
218 decreased levels of Tim50p, nor of any other import machinery component<sup>17</sup> (Figure S5C),  
219 suggesting that Tim50p phosphorylation likely contributes to the decreased import rates. Further,  
220 proteomic analysis of WT and  $\Delta ptc7$  yeast revealed that the  $\Delta ptc7$  strain exhibits a coordinated  
221 upregulation of proteins involved in the mitoCPR—an acute stress response specific to disrupted  
222 mitochondrial protein import (Figure 5G)<sup>40</sup>. Collectively, these data suggest that the loss of Ptc7p  
223 may elevate Tim50p phosphorylation, dampening mitochondrial import and contributing to a  
224 mitoCPR in yeast.

225         Decreased mitochondrial import may help explain the broad decreases in mitochondrial  
226 proteins seen in *Pptc7* KO tissues (Figure 3). Timm50 is a core component of the Timm23  
227 complex that translocates proteins possessing a mitochondrial targeting sequence (MTS) that are  
228 typically bound for the matrix<sup>41</sup>. We hypothesized that if Timm50 was selectively impaired in *Pptc7*  
229 KO tissues, then matrix-localized MTS-containing proteins would show greater decreases in our  
230 proteomics dataset relative to other mitochondrial proteins (e.g. proteins destined for the outer  
231 mitochondrial membrane (OMM)). Indeed, proteins that have both an MTS<sup>42</sup> and matrix  
232 localization<sup>43</sup> were significantly decreased relative to the OMM-localized proteins we measured in  
233 both heart and liver (Figure 5H) KO tissues. These decreased proteins include those whose  
234 dysfunction is associated with various dysregulated metabolites we identified in *Pptc7* KO tissues:  
235 Aldh4a1 (hyperprolinemia)<sup>44</sup>, Pcca, Pccb, Acad8, and lvd (BCAA and catabolite acylcarnitine  
236 accumulation)<sup>45</sup>, and Etfp and Etfdh (medium and long chain acylcarnitine accumulation)<sup>29</sup>  
237 (Figures 5I, J). Together, these data suggest that disruption of Timm50-mediated import could

238 broadly influence metabolic pathways, and may contribute to the widespread defects seen in the  
239 *Pptc7* knockout mouse.

240

### 241 **MTS-proximal phosphorylation can influence import and processing**

242 Close examination of our multiple phosphoproteomics datasets revealed a second trend related  
243 to mitochondrial protein import. We noticed that amongst elevated ( $p < 0.05$ ) mitochondrial  
244 phosphoisoforms identified in mouse and yeast, 11 candidate *Pptc7/Ptc7p* substrates have  
245 phosphorylated residues that lie within or directly proximal to their mitochondrial targeting  
246 sequences (Figure 6A). The localization of these phosphorylation events, coupled with data  
247 suggesting that *Ptc7p/Pptc7* modulates mitochondrial protein import (Figure 5), suggest that the  
248 phosphatase may play an additional role in import through the dephosphorylation of these  
249 “phospho-MTS” substrates.

250 One such phospho-MTS substrate, *Hadh*, can metabolize multiple nutrients that are  
251 disrupted in *Pptc7* KO mice (e.g. BCAAs, lysine, fatty acids)<sup>46</sup> (Figure 6B), and thus its dysfunction  
252 could contribute to the KO metabolic phenotypes. *Hadh* phosphorylation is also elevated in both  
253 tissues, and ranks third in fold change and q-value amongst > 9000 phosphoisoforms identified  
254 in liver (Figure 4E, Table 1). To test whether PPTC7 can directly dephosphorylate phospho-MTS  
255 substrates, we generated recombinant human HADH with site-specific phosphoserine  
256 incorporation at S13<sup>47,48</sup> (see Methods for details). We validated phosphoserine incorporation  
257 using PhosTag gels, which showed a mobility shift for phosphorylated, but not WT, HADH (Figure  
258 6C, lanes 1 and 2). Further, WT PPTC7, but not an inactive mutant, was able to dephosphorylate  
259 HADH (Figure 6C). These results were recapitulated with a second phospho-MTS substrate,  
260 ETHE1 (Figure S6A), demonstrating PPTC7 can directly dephosphorylate phospho-MTS  
261 substrates in vitro.

262 We next tested whether HADH S13 phosphorylation affects enzyme activity, but found no  
263 differences between pS13 and WT HADH (Figure S6B). We reasoned that the proximity of pS13

264 to the mitochondrial targeting sequence of Hadh may instead affect protein import or processing.  
265 Consistently, our proteomics analysis revealed an increased abundance of peptides from  
266 precursor Hadh (peptides that span the MTS cleavage site), but not in the mature (i.e., processed)  
267 protein (Figure S6C). To further examine Hadh import or post-import protein stability in cells, we  
268 expressed phosphomimetic (S13E) and non-phosphorylatable (S13A) HADH in 293 cells and  
269 found that the S13E mutant was not properly processed (Figure 6D). We observed similar protein  
270 processing and/or stability errors with phosphomimetic mutation of other phospho-MTS  
271 substrates, including ETHE1 (Figure S6D), Naxe (Figure S6E), and Iscu (Figure S6F). To  
272 determine whether the MTS-proximal phosphomimetic mutation is sufficient to disrupt processing,  
273 we generated chimeras containing the N-terminus of HADH fused to GFP and found that the  
274 S13E mutation likewise disrupted processing of the fusion protein (Figure 6E, S6G). Importantly,  
275 S13E-HADH-GFP still localized to mitochondria (Figures 6F, S6H), suggesting that the  
276 processing defect is not due to altered cellular targeting.

277 We next aimed to measure in vitro mitochondrial import efficiency on phospho-MTS  
278 substrates. Our in vitro site-specific phospho-incorporation system noted above could not be  
279 imported—an established problem for proteins produced in cell-free and *E. coli*-based systems<sup>49-</sup>  
280 <sup>51</sup>. Instead, we performed import assays with recombinant radiolabeled WT, S13A, and S13E  
281 HADH. Each construct could be imported into mitochondria, as evidenced by the time-dependent  
282 accumulation of proteinase K-protected species (Figure 6G); however, HADH S13E imported  
283 more slowly relative to WT and S13A HADH proteins. Additionally, phosphomimetic mutation of  
284 S13 HADH disrupted processing, as only full-length protein accumulated in mitochondria (Figure  
285 6G). To confirm the processing defect, we subjected HADH, S13A, and S13E mutants to an in  
286 vitro MPP processing assay that is uncoupled from protein import<sup>52</sup>. MPP (mitochondrial  
287 processing peptidase) removes MTS sequences upon entry into the matrix, and this processing  
288 event is critical for mature protein stability<sup>53</sup>. We find that phosphomimetic mutation of S13  
289 completely disrupted HADH processing (Figure 6H, bottom band), whereas WT and S13A

290 mutants were processed normally. With the caveat that we are analyzing phosphomimetic  
291 mutants, these data suggest that phosphorylation of HADH proximal to its MTS is sufficient to  
292 dampen, but not eliminate, mitochondrial import, and that dephosphorylation of HADH after  
293 translocation is required for MPP processing and mature protein stability. As failure to remove  
294 mitochondrial targeting sequences is associated with disrupted protein stability, these data  
295 suggest that an inability to dephosphorylate and subsequently process these proteins may further  
296 contribute to the decreased mitochondrial content and metabolic defects seen in *Pptc7* KO mice.

297

298

## 299 **DISCUSSION**

300 Despite numerous studies indicating that a large proportion of mitochondrial proteins are  
301 phosphorylated, how these modifications affect organellar function remains unclear. In the  
302 present study, we extended our findings on the yeast mitochondrial phosphatase Ptc7p into a  
303 mammalian system through the creation and characterization of a *Pptc7* knockout mouse.  
304 Surprisingly, we find that *Pptc7* is an essential gene in mammalian development, with its knockout  
305 leading to fully penetrant perinatal lethality.

306 Perinatal lethality in mouse models is often associated with defects in metabolism, when  
307 the newborn pup experiences a robust metabolic transition from placental to extrauterine  
308 nutrients<sup>23</sup>. *Pptc7* KO pups present with hypoketotic hypoglycemia—typically associated with FAO  
309 disorders<sup>29</sup>—which is the likely cause of their death. Despite this presentation, our molecular  
310 characterization using metabolomics, proteomics, and electron microscopy suggests a broader  
311 mitochondrial dysfunction, which, in certain circumstances, is also associated with hypoketotic  
312 hypoglycemia<sup>31</sup>. For example, knockout of *Cluh*, an RNA-binding protein that selectively  
313 influences mitochondrial biogenesis, causes perinatal lethality in mice with metabolic defects (e.g.  
314 hypoglycemia and hyperprolinemia) coupled with a stark decrease in the mitochondrial  
315 proteome<sup>54</sup>. These data suggest that disruption of genes required for general mitochondrial

316 homeostasis (e.g. *Cluh* and *Pptc7*) can cause symptoms similar to classes of inborn errors of  
317 metabolism through broad mitochondrial dysfunction.

318         The global metabolic and mitochondrial defects seen in *Pptc7* KO mice are likely due to  
319 aberrantly elevated phosphorylation of mitochondrial proteins. We focused our attention on two  
320 subsets of these phosphoproteins that could influence mitochondrial protein import and thus have  
321 widespread effects within this organelle. While both subsets affect mitochondrial protein import,  
322 we propose that elevated phosphorylation on Timm50 and Hadh mediate mitochondrial  
323 dysfunction through two distinct mechanisms: via direct dampening of the import machinery  
324 (Timm50), and by decreasing the import rate and/or processing of select mitochondrial-targeted  
325 precursor proteins (e.g. Hadh). The mitochondrial import machinery is regulated by kinases in  
326 yeast<sup>55-58</sup>, and phosphorylation of TOM complex proteins is plausible given their accessibility to  
327 cytoplasmic kinases. Less is known regarding phosphorylation on proteins within the TIM  
328 complex, and how the matrix-localized tail of Timm50—a protein spanning the mitochondrial inner  
329 membrane—could be accessed by such regulatory molecules is unknown. While a handful of  
330 studies suggest protein kinases (e.g. PKA) lie within the mitochondrial matrix<sup>59-61</sup>, it is not well  
331 understood how and when these enzymes translocate into the organelle or under what conditions  
332 they are active.

333         One possible mechanism for matrix-localized protein phosphorylation is that the  
334 modification of select mitochondrial proteins occurs outside of the mitochondrion. Our data  
335 support a model in which phosphorylation outside of mitochondria influences Hadh import rate  
336 and downstream protease processing. In plants, phosphorylation of the targeting sequences of  
337 chloroplast-bound proteins can alter their import efficiency by promoting or disrupting molecular  
338 associations with the import complex itself, or with chaperones that facilitate import<sup>62,63</sup>.  
339 Consistently, phosphorylation of mitochondrial precursors such as GSTA4-4<sup>64</sup>, CYP2B1, and  
340 CYP2E1<sup>65</sup> increases their association with cytosolic chaperones (e.g. Hsp70) to promote import,  
341 while phosphorylation of the Tom22p precursor in yeast increases its association with the import

342 complex<sup>55</sup>. Alternatively, precursor phosphorylation on mitochondrial proteins including CNP2<sup>66</sup>  
343 and Tom40p<sup>56</sup> decrease or inhibit targeting to the organelle, consistent with our data on Hadh  
344 (Figure 6). Beyond these examples, there are clues that mitochondrial proteins may be  
345 phosphorylated by cytosolic kinases on sequences distinct from their MTS: the outer  
346 mitochondrial membrane (OMM) protein MitoNEET is phosphorylated within its N-terminus, which  
347 may affect its membrane targeting<sup>67</sup>; ferredoxin is phosphorylated at T116 by OMM-localized  
348 PKA to activate enzymatic activity and alter heme biosynthesis<sup>68</sup>, and PKA has also been shown  
349 to influence the import of NDUFS4 through phosphorylation of a residue near its C-terminus<sup>69</sup>.  
350 Notably, PKA can be anchored to the OMM through a subset of AKAP proteins<sup>70</sup>, suggesting this  
351 kinase may be properly localized to phosphorylate mitochondrial-destined proteins. Collectively,  
352 these data suggest that cytosolic phosphorylation of mitochondria-bound proteins can affect their  
353 import and function through multiple mechanisms. Further, the possibility that phosphorylation  
354 affects organellar targeting across species—including yeast, plants, and mammals—lead us to  
355 propose that this may be a widespread, but underappreciated, mode of regulation for organelle-  
356 bound protein precursors.

357 Phosphorylation of various organellar targeting sequences across species has been  
358 shown to affect association with cytosolic chaperones to enable import. Evidence exists for a  
359 similar chaperone to enable mitochondrial import: a biochemically isolated factor, termed  
360 mitochondrial import stimulation factor (MSF), was identified as a pair of 14-3-3 proteins<sup>51,71,72</sup>—  
361 proteins that preferentially bind to phosphoserine-containing sequences<sup>73</sup>. At least one phospho-  
362 MTS target (Iscu pS14) identified in this work binds robustly to 14-3-3 proteins<sup>73</sup>, and this  
363 phosphorylation event has been linked to Iscu protein stability<sup>74</sup>. Many phospho-MTS targets have  
364 preferred 14-3-3 sequences<sup>75</sup>, suggesting that these phosphorylation events may influence  
365 association with MSF, Hsp70<sup>64</sup>, or other chaperones to impact import.

366 After import into the organelle, dephosphorylation is presumably required for proper  
367 processing and maturation. This model was suggested for phosphorylated chloroplast precursor



368 proteins<sup>63</sup>, but a candidate phosphatase has not yet been identified. Plants have multiple *Pptc7*  
369 paralogs<sup>76</sup>, with a subset predicted to be chloroplast-localized, suggesting that *Pptc7* paralogs  
370 likewise may mediate these functions in plants. It is also notable that Timm50 has a vestigial  
371 phosphatase domain<sup>77</sup>, which perhaps once functioned to dephosphorylate these proteins before  
372 matrix import. In most organisms, Timm50 does not possess critical catalytic residues within its  
373 phosphatase domain<sup>77</sup>; however, in select lower organisms, such as the parasitic *T. Brucei*,  
374 Timm50 (called TbTim50) retains phosphatase activity<sup>78</sup>. In this species, ablation of catalytic  
375 phosphatase residues alters the stability of mitochondrial proteins such as VDAC<sup>78</sup>, suggesting  
376 functional relevance. It is tempting to speculate that Timm50, and ultimately *Pptc7*, have evolved  
377 to coordinate dephosphorylation of proteins targeted to the mitochondrion.

378 Overall, our data add to a growing narrative that mitochondrial PTMs are widespread and  
379 impactful. It remains largely unclear whether the bulk of these PTMs are regulatory in nature, or  
380 are instead adventitious and unintentionally disruptive, and thus merely need to be removed to  
381 maintain optimal mitochondrial function. It is intriguing that our work on phosphorylation draws  
382 parallels to mitochondrial acylation, where the enzymes tasked with removing PTMs are better  
383 understood and seem to bear the larger metabolic managerial burden. In this regard, it is further  
384 noteworthy that mice lacking the mitochondrial deacetylase Sirt3 exhibit similar phenotypes to the  
385 *Pptc7* KO mice, albeit to a lesser extent and not until they are stressed<sup>79,80</sup>. However, our data  
386 also suggest that some mitochondrial phosphorylation events have important regulatory potential.  
387 First, the fact *Pptc7* KO mice seemingly develop normally, but fail to thrive during a specific stage,  
388 is perhaps consistent with a regulatory switch of sorts. Second, our data lead us to speculate that  
389 select mitochondrial proteins are phosphorylated in the cytosol, and then dephosphorylated by  
390 phosphatases within the organelle. In this model, proteins would be available to various cytosolic  
391 kinases, whose classic signaling functions may then serve to direct proteins to mitochondria or to  
392 alter their import rates. Regardless of its regulatory potential, our data demonstrate that *Pptc7* is  
393 required for surviving the perinatal transition, and show that protein dephosphorylation within the



394 mitochondrial matrix is essential for mammalian development. Further studies will be required to  
395 understand the full repertoire of Pptc7 substrates, the potential regulation of this phosphatase,  
396 and the physiological consequences of Pptc7 disruption in conditions beyond birth.  
397

## METHODS

### Creation of the Pptc7 knockout mouse model

A Pptc7 knockout strain was generated using CRISPR-Cas9 technology in the C57BL/6J (B6) strain of *Mus musculus* [NCBI tax:10090]. Mutational details are provided at MGI; Pptc7<sup>em1Pag</sup> at MGI:6094244, and Pptc7<sup>em2Pag</sup> at MGI:6143811. The second and third coding exons of Pptc7 were targeted for genome editing using two target sequences to maximize specificity (all predicted off-target sites had (i) at least 3 mismatches, with at least 1 mismatch in the 12bp seed region or (ii) 2 mismatches in the seed region). In vitro transcription template was generated by overlap-extension PCR with one oligo carrying a 5' T7 adapter, the target sequence, and a portion of the common gRNA sequence, and the other oligo carrying the antisense common gRNA sequence. In vitro template was column-purified and in vitro transcribed with the MEGAshortscript kit (Thermo-Fisher), and the resultant gRNA was cleaned with the MEGAclean kit (Thermo-Fisher). For injection-grade purification, gRNA was ammonium acetate purified, washed with 70% ethanol, and resuspended in injection buffer. One-cell fertilized C57BL/6J embryos derived from mice obtained from Jackson laboratories were microinjected with a mixture of both gRNAs (25 ng/ul each) and Cas9 protein (PNA Bio, 40 ng/ul), and then implanted into pseudopregnant B6 recipients. Tail DNA was harvested from resultant pups at weaning and used for genotyping.

### Breeding, care, and selection of mice for experimental procedures

All animal work was done in accordance with IACUC approval (protocol/animal welfare assurance #A3368-01). The Pptc7<sup>-/-</sup> *Mus musculus* strain was generated via CRISPR and is registered with MGI under the names C57BL/6J-Pptc7<sup>em1Pag</sup> (accession number MGI:6094249) and C57BL/6J-Pptc7<sup>em2Pag</sup> (accession number MGI:6143812); two strains are registered as two independently segregating Pptc7<sup>-/-</sup> alleles were generated in our founder mouse – one with a 4 bp deletion in exon 2 (hereby called E2; MGI:6094244), and one with a 1 bp deletion in exon 3 (hereby called E3; MGI:6143811). As the phenotypes of all Pptc7-null genotypes were identical (see Figure S1), all genotypes are collectively annotated as “Pptc7<sup>-/-</sup> mice” and not by their specific alleles unless noted in

the text or figure legends. The C57BL/6J wild type strain (Jackson Laboratories) was used for the generation of the *Pptc7*-CRISPR strain as well as for outbreeding. Mice were housed in a pathogen-free vivarium on a 12-hr light:dark cycle. Mice were group housed by strain and sex under temperature- and humidity-controlled conditions and received ad libitum access to water and food. Upon weaning, mice were maintained on a standard chow diet (Formulab 5008; 17.0% kcal fat; 56.5% carbohydrate; 26.5% protein) Strains were housed within the same vivarium throughout the duration of the study. Studies were performed with P0 mouse pups, sacrificed within 24 hours of their birth unless otherwise noted. Sex was not determined for experiments as males and females are indistinguishable at P0. Littermates were typically selected according to genotype and randomly assigned to experimental groups.

### **Genotyping analysis**

Tail tips were isolated from each mouse and used as a source of genomic DNA (gDNA). Tails were resuspended in 600  $\mu$ l of Genomic Lysis Solution (20 mM Tris, pH 8.0, 150 mM NaCl, 100 mM EDTA, 1% SDS) supplemented with 3  $\mu$ l concentrated proteinase K (Roche) and incubated at 55°C overnight. After the overnight incubation, samples were cooled to room temperature for 10 min. before the addition of 200  $\mu$ l Protein Precipitation Solution (Qiagen). Samples were then incubated on ice for 5 min. before vortexing for ~15 s. per sample. Samples were centrifuged (16K x g) for 5 min. to pellet precipitated proteins. The supernatant was removed and DNA was purified via isopropanol precipitation. gDNA was quantified using a Nanodrop (Thermo-Fisher) and ~300 ng of gDNA was added to each genotyping reaction. We generated a genotyping strategy that exploited unique restriction sites that were either created (E3d1) or destroyed (E2d4) within each *Pptc7* indel. Within exon 2, the 4 bp deletion disrupted a naturally-occurring BsrBI site, which enabled amplification of ~600 bp flanking the indel and subsequent restriction digest. Within exon 3, the 1 bp deletion generated a PstI site, which enabled amplification of ~330 bp flanking the indel and digestion with PstI (Thermo-Fisher) for 60 min. at 55°C. Products were resolved on a 1% agarose gel.

### **Next generation sequencing**

The F0 founder mouse was sacrificed at 18 months of age via CO<sub>2</sub> asphyxiation and tissues isolated, including brain (cerebrum), small intestine, kidney, skeletal muscle (gastrocnemius), spleen, stomach, liver, and heart, and tissues from two heterozygous F1 offspring (age 15 months, female). Genomic DNA (gDNA) was harvested from each tissue using a Qiagen DNeasy Blood & Tissue Kit (Qiagen) according to the manufacturer's protocol. Each sample was amplified using genotyping primers for E2 or E3 as a template for NGS-compatible sequencing, and then amplified using i5/i7 compatible NGS primers. Purified amplicons were submitted to the University of Wisconsin-Madison Biotechnology Center, where libraries were prepared with guidance from Illumina's 16s Metagenomic Sequencing Library Preparation Protocol, Part #15044223 Rev. B (Illumina), with slight modifications. Illumina dual indexes and Sequencing adapters were added. Following PCR, libraries were cleaned using a 0.9x volume of AxyPrep Mag PCR clean-up beads, and were standardized to 2 nM and pooled prior to sequencing. Paired end, 150 bp sequencing was performed using the Illumina MiSeq Sequencer and a MiSeq 300 bp (v2) sequencing cartridge. Images were analyzed using the standard Illumina Pipeline, version 1.8.2. Analysis of NGS data was performed by the University of Wisconsin (UW) biotechnology center.

### **Serum metabolite measurements**

After decapitation of P0 pups, a small amount of whole blood was used to measure blood glucose using a CVS Health Advanced Blood Glucose Meter (CVS). Blood glucose levels were taken at least twice, and averaged values reported for each mouse. The remainder of the blood was collected, spun at 16.1K x g for 10 min. at room temperature, serum isolated and stored at -80°C until use. Circulating insulin was assayed using the Ultra Sensitive Mouse Insulin ELISA kit (Crystal Chem) according to manufacturer's instructions using the "Low Range Assay" protocol. Briefly, serum from n=8 WT, n=5 heterozygous, and n=10 KO mice was thawed on ice. 5 µl of serum was assayed for each mouse and quantified relative to the standard curve generated from the kit. Lactate levels were measured in serum isolated from n=9 WT, n=20 heterozygous, and n=7 KO mice using the Lactate Colorimetric/Fluorometric Assay Kit (BioVision) according to manufacturer's instructions, using 5 µl of serum from

each mouse quantified relative to the standard curve generated from the kit. Ketones were measured in serum isolated from newborn mice using the Ketone Bodies Kit (both R1 and R2 sets, Wako Biosciences) as previously described<sup>6</sup>. Serum from n=9 WT, n=13 heterozygous, and n=6 KO mice was thawed on ice, and 5  $\mu$ l was assayed for each mouse and quantified relative to a  $\beta$ -hydroxybutyrate standard curve. For all serum tests, values reported are averaged from all measurements per group, and significance was tested using a two-tailed Student's t-test.

## **Metabolomics**

Heart and liver tissues were immediately harvested and snap frozen in liquid nitrogen unless otherwise noted. Metabolites were extracted from cryo-pulverized tissue with a solvent mixture consisting of 7:2:1 HPLC grade methanol:water:chloroform; this was followed by a subsequent extraction of lipids by addition of chloroform to 50% of final volume. Acylcarnitines were analyzed by reversed phase liquid chromatography – tandem mass spectrometry on a Q Exactive Focus operating in positive ion mode (RPLC-ESI-MS/MS). Amino acids and other polar metabolites were derivatized with methoxyamine-HCl and MSTFA and analyzed by gas chromatography – electron ionization mass spectrometry on a GC-Orbitrap (GC-EI-MS). Lipids and Co-enzyme Q (CoQ) intermediates were analyzed by RPLC-ESI-MS/MS in alternating positive and negative ion mode, with PRM targets for selected CoQ intermediates<sup>81</sup>. Acyl-carnitines and CoQ intermediates were quantified from peak area using Thermo's Tracefinder application. GC features were quantified using in-house software (modified from <sup>82</sup>), and lipid features were quantified using the Thermo's Compound Discoverer<sup>TM</sup> 2 application. Identification of features was performed with spectra matching to library of standards (NIST 14 <sup>83</sup>) or predicted fragmentation spectra (Lipidex, <sup>84</sup>).

## **Electron microscopy**

Tissues were harvested from litters of live P0 pups and were quickly washed in PBS and fixed in ~5 ml of fixation buffer (2.5% glutaraldehyde, 2.0% paraformaldehyde in 0.1M sodium phosphate buffer, pH 7.4) overnight @ 4°C. The tissue was then post fixed in 1% Osmium Tetroxide in the same buffer for 3 hrs @ RT, and the samples were

dehydrated in a graded ethanol series, then further dehydrated in propylene oxide and embedded in Epon epoxy resin. Semi-thin (1  $\mu\text{m}$ ) sections were cut with a Leica EM UC6 Ultramicrotome and collected on 200 mesh copper grids. Sections were and contrasted with Reynolds lead citrate and 8% uranyl acetate in 50% EtOH. Ultrathin sections were observed with a Philips CM120 electron microscope and images were captured with an AMT BioSprint side mounted digital camera using AMT Capture Engine software.

### **Enzyme assays**

Citrate synthase activity was assayed as previously described<sup>17</sup> using genotype verified tissues (n=3-4 each genotype, wild type and Pptc7 knockout heart and tissues). Error was calculated using standard deviation, and significance was calculated using a Student's t test. Hadh activity was assayed as previously described<sup>85</sup>. Briefly, recombinant human HADH (Entrez Gene #3033) or HADH site-specifically phosphorylated at S13 (see "Phosphoserine incorporation of recombinant proteins using cell free protein synthesis" for more details) were generated with a C-terminal FLAG tag using cell free protein synthesis. Proteins were immunoprecipitated (IPed) using M2-FLAG antibody-conjugated magnetic beads, eluted in FLAG peptide, and HADH activity was assayed using 2.5  $\mu\text{l}$  eluate from each IP (corresponding to ~200 ng recombinant protein per reaction). Error was calculated using standard deviation, and significance was calculated using a Student's t test.

### **Quantitative multiplexed proteomics and phosphoproteomics**

Protein from lysed, homogenized mouse tissues was digested into tryptic peptides following previously reported protocols.<sup>86</sup> This yielded sufficient material to label 0.35 mg of each heart sample and 0.5 mg of each liver sample with tandem mass tags (TMT10plex Isobaric Label Reagent Set, Thermo-Fisher). Labeling was performed following manufacturer recommended protocols except for the peptide:label ratio, which was changed to 0.5:0.8::mg:mg. Equal amounts of sample were combined for each 10-plex experiment following validation of labelling efficiency (> 95% labelling of N-terminal amines). Phosphopeptide enrichment with titanium chelation (Ti-IMAC, ReSyn

Biosciences) was performed on pooled samples using previously reported methods<sup>87</sup>. The depleted sample was saved for protein quantitation. 500 µg of each depleted sample and the entirety of each phosphopeptide enrichment were separated over an Acquity BEH C18 reverse phase column (130 Å pore size, 1.7 µm particle size, 2.1 x 100 mm, Waters Corp) held at 60 °C using a Dionex Ultimate 3000 uHPLC (600 µL/min flow rate, Thermo-Fisher) running with basic mobile phases. Resulting fractions were analyzed on a q-LTQ-OT hybrid mass spectrometer (Orbitrap Fusion Lumos, Thermo-Fisher) operated under data dependent acquisition following nano-LC separation and electrospray ionization. MS1 survey scans were performed in the orbitrap (60K resolution, AGC – 1e6, 50 ms max injection time). Product ion scans following HCD fragmentation (35% NCE) were also performed in the orbitrap (60K resolution, AGC – 2e5, 118 ms max injection time). Monoisotopic precursor selection and dynamic exclusion (60 s) were enabled. Thermo RAW files were searched with the Open Mass Spectrometry Search Algorithm (OMSSA) within the Coon OMSSA Proteomic Analysis Software Suite (COMPASS) against a database of canonical proteins and isoforms (Uniprot, *Mus musculus*)<sup>88,89</sup>. TMT labelling was imposed as a fixed modification at lysines and N-termini and variable at tyrosines. Additionally, phosphorylation of serine, threonine, and tyrosine, as well as accompanying neutral losses, were set as variable modifications for enriched samples. Search results were filtered to a false discovery rate of 1% at the peptide and protein levels. Sites of phosphorylation were considered localized if given a localization score >0.75 by the PhosphoRS module within COMPASS<sup>90</sup>. Phosphopeptide intensities were normalized to the total reporter ion intensity at the protein level, as well as, protein mean-normalized fold change. An associated P value was calculated using Student's t test assuming equal variance. Multiple hypothesis testing was performed by Benjamini-Hochberg correction.

### **RNA isolation and qPCR**

RNA was isolated using an RNeasy kit (Qiagen) per manufacturer's instructions. cDNA was prepared using 500 ng of total RNA using the SuperScript III First-Strand Synthesis System (Thermo-Fisher). cDNA was made exclusively with the oligo(dT) primer, and the kit was used according to the manufacturer's protocol. cDNA was normalized, and 100



ng was used as a template for each qPCR reaction. Reactions were set up using 1x PowerSYBR master mix (Thermo-Fisher), 200 nM forward and reverse primers (each) and water to a final volume of 20  $\mu$ l total. qPCR was run on a QuantStudio 6 Flex (Applied Biosystems) and data were captured using QuantStudio Real Time PCR system software. Data were analyzed using the  $\Delta\Delta$ Ct method (n=3-4 samples per genotype), with error bars representing standard deviation and significance calculated using a two-tailed Student's t test.

### **Cloning and site directed mutagenesis**

*Escherichia coli* strain DH5 $\alpha$  (NEB) was used for all cloning applications and grown at 37  $^{\circ}$ C in LB media with antibiotics. *Escherichia coli* strain BL21-CodonPlus (DE3)-RIPL (Agilent) was used for all protein expression and purification purposes. Site directed mutagenesis was performed as previously described <sup>81</sup>.

### **Mitochondrial import assays**

Various strains derived from the haploid W303 (*his3 leu2 lys2 met15 trp1 ura3 ade2*) yeast were used for mitochondrial isolation for import assays. The  $\Delta$ *ptc7* strain was generated in W303 yeast as previously described <sup>17</sup>. The Tim50p studies were performed with a previously described W303 strain in which the *TIM50* ORF was placed under control of the *GAL7* promoter <sup>38</sup>. For mitochondrial isolation from yeast, a single colony of W303 yeast was incubated in 3-4 ml of YPD media overnight.  $1 \times 10^8$  cells were diluted into 500 ml of YEP supplemented with 3% glycerol 0.1% dextrose. Yeast were grown at 30 $^{\circ}$ C in an orbital shaker (230 rpm) for 19-20 hrs to a final OD of ~5-6 (with an OD of  $1 = 1e7$  cells). Mitochondria were isolated as previously described for mitochondrial import <sup>91</sup>. Isolated mitochondria were resuspended using wide-bore tips to a final concentration of 10 mg/ml in SEM buffer (250 mM sucrose, 1 mM EDTA, and 10 mM MOPS, pH 7.2), snap frozen in liquid nitrogen, and stored at -80 $^{\circ}$ C until use in import assays. Recombinant HADH or cytochrome *b*<sub>2</sub>-(167) $_{\Delta 19}$ -DHFR (a gift from Elizabeth Craig) were generated using the quick TnT<sup>®</sup> Quick Coupled Transcription/Translation System (Promega) using either the T7 kit (HADH) or the SP6 kit (cytochrome *b*<sub>2</sub>-(167) $_{\Delta 19}$ -DHFR) supplemented with <sup>35</sup>S-Methionine and Cysteine (EasyTag EXPRESS35S protein



labeling mix, Perkin Elmer) according to the manufacturer's instructions. Reactions were terminated by placing reactions on ice until use in mitochondrial import assays. For mammalian targets, radiolabeled HADH (WT, S13A, S13E) precursor proteins were generated by in vitro transcription/translation reactions in rabbit reticulocyte lysate in the presence of <sup>35</sup>S-Methionine. Mitochondria were isolated from HEK293T cells as described before <sup>92</sup>. For import assays, mitochondria were resuspended in import buffer (250 mM sucrose, 5 mM magnesium acetate, 80 mM potassium acetate, 10 mM sodium succinate, 20 mM HEPES-KOH, pH 7.4) supplemented with 1 mM DTT and 5 mM ATP. Where indicated, the membrane potential was dissipated prior to the import reaction by addition of 8 μM antimycin A, 1 μM valinomycin and 20 μM oligomycin (AVO). Import reactions were started by addition of radiolabeled precursor proteins followed by incubation at 37°C for indicated times. Reactions were stopped by addition of AVO and non-imported precursor proteins removed by digestion with Proteinase K. Mitochondria were re-isolated by centrifugation at 10,000 x g for 10 min at 4°C and washed once in import buffer. Samples were analyzed on SDS-PAGE followed by digital autoradiography. Images were quantified using ImageJ.

### **MPP processing assay**

MPP processing assays using soluble mitochondrial extracts from mouse liver were performed as described previously <sup>52</sup>. In short, mitochondria were lysed in digitonin and the obtained extract incubated with radiolabeled precursor proteins. Samples were incubated for various time points at 37°C and reactions stopped by addition of 4x Laemmli buffer containing 2% (v/v) β-mercaptoethanol. Samples were analyzed by SDS-PAGE and blotted onto PVDF membranes followed by autoradiography and immunodetection.

### **Generation of cell free protein synthesis reagents for phosphoserine incorporation**

Cell free protein synthesis (CFPS) was used to generate phosphoserine incorporation as previously described <sup>47</sup>. The bacterial strain C321.ΔA.Δserb.Amp<sup>S</sup> was a gift from Jesse Rinehart (Addgene plasmid #68306) and was used to generate lysates for the CFPS reactions as described <sup>47</sup>. Bacteria were grown in 2xYPTG media (16g/L tryptone, 10g/L yeast extract, 5g/L NaCl, 5g/L K<sub>2</sub>HPO<sub>4</sub>, 3g/L KH<sub>2</sub>PO<sub>4</sub>, and 18g/L glucose filter-sterilized)

with 2 mM phosphoserine and antibiotic selection at 30 °C, 220 rpm. At OD 0.6, 1 mM IPTG was added and, at OD 3, cells were harvested by centrifugation (5,000 rcf, 15 min, 4 °C). Bacteria were washed 3 times in cold S30 buffer (10 mM Tris-acetate pH 8.2, 14 mM magnesium acetate, 60 mM potassium acetate) with 1 mM DTT and the pellet was weighed, snap frozen, and stored at -80°C until lysis. Thawed bacteria were lysed by resuspension in S30 buffer with 2 mM DTT (0.8 mL per 1 g wet cells) and sonicated as described by Kwon and Jewett<sup>93</sup> (~900 J per 1 L cells). Lysates were supplemented with 1 mM DTT, clarified by centrifugation (12,000xg, 10 min, 4 °C), and the clarified supernatant was incubated in a run-off reaction (1 hour, 250 rpm, 37 °C, covered in foil). The run-off reaction was clarified by a second centrifugation (12,000xg, 30 min, 4 °C) and supernatant was collected with careful avoidance of loose cell debris. Lysates were aliquoted, snap frozen, and stored at -80°C until use.

### **Phosphoserine incorporation of recombinant proteins using cell free protein synthesis**

CFPS reactions were performed as described by Oza et al<sup>47</sup>. Reactions contained 30% v/v cell extract supplemented with 1.2 mM ATP\*, 0.85 mM each of GTP\*, UTP\*, and CTP\* (pH 7 – 7.2); 34 µg/mL folic acid\*; 170 µg/mL of *E. coli* tRNA mixture\*; 13.3 µg/mL plasmid (maxiprep); 100 µg/mL T7 RNA polymerase; 2 mM each of standard amino acids<sup>†</sup> (omitting methionine and cysteine in S35 experiments); 0.33 mM NAD\*; 0.27 mM coenzyme A\*; 1.5 mM spermidine\*; 1 mM putrescine\*; 4 mM oxalic acid\*; 130 mM potassium glutamate<sup>‡</sup>; 10 mM ammonium glutamate<sup>‡</sup>; 12 mM magnesium glutamate<sup>‡</sup>; 33 mM phosphoenolpyruvate (pH 7), 2 mM phosphoserine, 57 mM HEPES pH 7\*.

Some reagents can be pre-mixed, aliquoted, and stored at -20 °C (\*pre-mix, <sup>†</sup>amino acid mix prepared as described<sup>94</sup>; <sup>‡</sup>salt mix at pH 7 with KOH) and the final reaction should be at pH 6.5-7. CFPS reactions were initiated by thoroughly mixing the cell extract, incubated for 17-20 hours at 30 °C, and performed in 15, 30, or 50 µL reactions. For 50 µL S35 experiments, reactions were performed in a parafilm, screwcap microcentrifuge tube with shaking (350 rpm).

### **PPTC7 and Ptc7p recombinant protein purification and phosphatase assays**

N41-Ptc7p and catalytically inactive mutants were prepared as previously described<sup>17</sup>. His<sub>8</sub>-MBP-tev-PPTC7<sup>NΔ32</sup> and mutants were expressed in *E. coli* (BL21[DE3]-RIPL strain) by autoinduction as previously described<sup>17</sup>. Cells were isolated and resuspended in lysis buffer (100 mM HEPES pH 7.2, 300 mM NaCl, 5 mM BME, 0.25 mM PMSF, 1 mg/mL lysozyme (Sigma), and 7.5% glycerol) Cells were lysed by sonication (4 °C), clarified by centrifugation (15,000 g, 30 min, 4 °C), and mixed with cobalt IMAC resin (Talon resin) for one hour (4 °C). Resin was washed with Wash Buffer (20 bed volumes: Lysis buffer without lysozyme) and His-tagged protein was eluted with Elution Buffer (50 mM HEPES pH 7.2, 150 mM NaCl, 5 mM BME, 5% glycerol 100 mM imidazole). Eluted protein was concentrated with a 50-kDa MW-cutoff spin filter (Merck Millipore Ltd.) and exchanged into Storage Buffer (50 mM HEPES pH 7.2, 150 mM NaCl, 5 mM BME, 5% glycerol). His<sub>8</sub>-MBP- PPTC7<sup>NΔ32</sup> was incubated with TEV protease (1:50, TEV/fusion protein, mass:mass using  $\epsilon_{280} = 88,615 \text{ M}^{-1}\text{cm}^{-1}$  and MW = 73.9 kDa) for 1 hour (25 °C), then incubated with cobalt IMAC resin for 1 hour (4 °C). Cleaved PPTC7<sup>NΔ32</sup> ( $\epsilon_{280} = 20,775 \text{ M}^{-1}\text{cm}^{-1}$ , MW = 29.6 kDa) was collected, concentrated with a 10-kDa MW-cutoff spin filter, and exchanged into Storage Buffer. Protein was aliquoted, frozen in N<sub>2</sub>, and stored at -80 °C. Phosphatase assays were run in 10  $\mu\text{l}$  total volume comprised of 50 mM Tris, pH 8.0, 5 mM MnCl<sub>2</sub>, 5  $\mu\text{l}$  of site-specifically phosphorylated recombinant protein (~400 ng substrate) and ~200 ng active (wild type) or catalytically inactive (D/A mutants) phosphatase per reaction. Reactions were allowed to proceed for 30 minutes at room temperature, after which they were terminated through the addition of sample buffer to 1x, boiled at 95°C, and run on PhosTag gels to determine dephosphorylation efficiency.

### **Transfection and protein expression in 293 cells**

293 cells were cultured in DMEM (high glucose, no pyruvate, Thermo-Fisher) supplemented with 10% heat inactivated fetal bovine serum (FBS) and 1x penicillin/streptomycin. Cells were grown in a temperature-controlled CO<sub>2</sub> incubator at 37°C and 5% CO<sub>2</sub>. Cells were subcultured using 0.05% trypsin-EDTA every 2-3 days. For transfections, cells were split to ~40% confluence on Day 1. On Day 2, cells were

transfected with 7.5 µg Maxiprep-purified plasmid supplemented with 20 µg linear polyethylenimine (PEI, PolySciences), and 900 µL Opti-MEM (LifeTechnologies) as previously described<sup>95</sup>. After 48 hours, cells were collected or fixed for downstream applications.

### **Fluorescence Microscopy**

Glass cover slips (#1.5) were sterilized and placed into single wells of 12 well plates. 293 cells were seeded at ~60% confluence and transfected with plasmids encoding GFP or N-terminal HADH-GFP fusions as previously described<sup>95</sup>. 20 hours after transfection, cells were labeled with 25 nM MitoTracker Red CMXRos for 15 minutes at 37°C. Cells were then washed 3x with PBS, and fixed using 4% paraformaldehyde in PBS for 15 minutes at room temperature. After fixation, cells were washed 3x with PBS, and nuclei were stained for 5 minutes with 2 µg/ml [final c] of Hoechst. After nuclear staining, cells were washed again 3x with PBS and mounted to glass slides using ProLong Diamond reagent overnight in the dark, per manufacturer's instructions. Cells were imaged on a Nikon A1R-SI+ confocal microscope using a 60x oil-based objective using constant settings (e.g. laser intensity) across all images acquired. Images were collected in all three fluorescent channels using NIS element software.

### **Quantification and Statistical Analysis**

See each individual method for the associated statistical analysis.

## ACKNOWLEDGEMENTS

We thank members of the Pagliarini laboratory for helpful discussions and Amy Lin for her assistance with figure generation. The authors thank the Genome Editing and Animal Modeling core at the University of Wisconsin Biotechnology Center, particularly Kathy Krentz and Dustin Rubinstein, for their design and creation of the CRISPR-Cas9 *Pptc7* knockout model. We also thank the University of Wisconsin Biotechnology Center DNA Sequencing Facility for providing next generation sequencing (NGS) services, and the UWBC Bioinformatics Resource Center for the analysis of the NGS data. We thank Ben August and the UW Electron Microscope (EM) Facility for processing samples and for providing training and expertise in EM data acquisition and analysis. We thank Benjamin Des Soye and Michael Jewett for protocols and assistance with the cell free protein synthesis (CFPS) experiments. We thank Elizabeth Craig and her laboratory for the cytochrome  $b_2$ -(167) $\Delta_{19}$ -DHFR plasmid, advice, and protocols on mitochondrial import assays. We thank Toshiya Endo for the kind gift of the *GAL7::TIM50* strain used in the study. Research reported in this publication was supported by the National Institute of Diabetes and Digestive and Kidney Diseases and National Institute of General Medical Sciences of the National Institutes of Health under award numbers R01DK098672 (to D.J.P.), T32DK007665 (to N.M.N.), and P41GM108538 (to J.J.C. and D.J.P). The Genome Editing and Animal Modeling core at UW is supported by a University of Wisconsin Carbone Cancer Center Support Grant (P30 CA014520). This work was further supported by a Morgridge Postdoctoral Research Fellowship (to K.A.O.), the Deutsche Forschungsgemeinschaft and the Excellence Initiative of the German Federal & State Governments (EXC 294 BLOSS) (to C.M.), and the Emmy-Noether Programm of the Deutsche Forschungsgemeinschaft (to F.N.V).

## **AUTHOR CONTRIBUTIONS**

N.M.N. and D.J.P conceived of the project and its design and wrote the manuscript. N.M.N. and K.L.S. maintained the mouse colony. N.M.N., F.N.V., D.C.L. prepared samples and performed biochemical experiments. G.M.W. and K.A.O. acquired mass spectrometry data. N.M.N., G.M.W., K.A.O., F.N.V., D.C.L., A.D.A., C.M., J.J.C. and D.J.P. analyzed data.

## **DECLARATION OF INTERESTS**

The authors declare no competing financial interest.

## REFERENCES

- 1 Nunnari, J. & Suomalainen, A. Mitochondria: in sickness and in health. *Cell* **148**, 1145-1159, doi:10.1016/j.cell.2012.02.035 (2012).
- 2 Covian, R. & Balaban, R. S. Cardiac mitochondrial matrix and respiratory complex protein phosphorylation. *Am J Physiol Heart Circ Physiol* **303**, H940-966, doi:10.1152/ajpheart.00077.2012 (2012).
- 3 Pagliarini, D. J. & Dixon, J. E. Mitochondrial modulation: reversible phosphorylation takes center stage? *Trends Biochem Sci* **31**, 26-34, doi:10.1016/j.tibs.2005.11.005 (2006).
- 4 Trub, A. G. & Hirschey, M. D. Reactive Acyl-CoA Species Modify Proteins and Induce Carbon Stress. *Trends Biochem Sci* **43**, 369-379, doi:10.1016/j.tibs.2018.02.002 (2018).
- 5 Carrico, C., Meyer, J. G., He, W., Gibson, B. W. & Verdin, E. The Mitochondrial Acylome Emerges: Proteomics, Regulation by Sirtuins, and Metabolic and Disease Implications. *Cell Metab* **27**, 497-512, doi:10.1016/j.cmet.2018.01.016 (2018).
- 6 Grimsrud, P. A. *et al.* A quantitative map of the liver mitochondrial phosphoproteome reveals posttranslational control of ketogenesis. *Cell Metab* **16**, 672-683, doi:10.1016/j.cmet.2012.10.004 (2012).
- 7 Hebert, A. S. *et al.* Calorie restriction and SIRT3 trigger global reprogramming of the mitochondrial protein acetylome. *Mol Cell* **49**, 186-199, doi:10.1016/j.molcel.2012.10.024 (2013).
- 8 Yadava, N., Potluri, P. & Scheffler, I. E. Investigations of the potential effects of phosphorylation of the MWFE and ESSS subunits on complex I activity and assembly. *Int J Biochem Cell Biol* **40**, 447-460, doi:10.1016/j.biocel.2007.08.015 (2008).
- 9 Linn, T. C., Pettit, F. H. & Reed, L. J. Alpha-keto acid dehydrogenase complexes. X. Regulation of the activity of the pyruvate dehydrogenase complex from beef kidney mitochondria by phosphorylation and dephosphorylation. *Proc Natl Acad Sci U S A* **62**, 234-241 (1969).
- 10 Dittenhafer-Reed, K. E. *et al.* SIRT3 mediates multi-tissue coupling for metabolic fuel switching. *Cell Metab* **21**, 637-646, doi:10.1016/j.cmet.2015.03.007 (2015).
- 11 Wagner, G. R. & Hirschey, M. D. Nonenzymatic protein acylation as a carbon stress regulated by sirtuin deacylases. *Mol Cell* **54**, 5-16, doi:10.1016/j.molcel.2014.03.027 (2014).
- 12 Phillips, D., Aponte, A. M., Covian, R. & Balaban, R. S. Intrinsic protein kinase activity in mitochondrial oxidative phosphorylation complexes. *Biochemistry* **50**, 2515-2529, doi:10.1021/bi101434x (2011).
- 13 Weinert, B. T., Moustafa, T., Iesmantavicius, V., Zechner, R. & Choudhary, C. Analysis of acetylation stoichiometry suggests that SIRT3 repairs nonenzymatic acetylation lesions. *EMBO J* **34**, 2620-2632, doi:10.15252/embj.201591271 (2015).
- 14 Wu, R. *et al.* A large-scale method to measure absolute protein phosphorylation stoichiometries. *Nat Methods* **8**, 677-683, doi:10.1038/nmeth.1636 (2011).
- 15 Baeza, J., Smallegan, M. J. & Denu, J. M. Mechanisms and Dynamics of Protein Acetylation in Mitochondria. *Trends Biochem Sci* **41**, 231-244, doi:10.1016/j.tibs.2015.12.006 (2016).
- 16 Pagliarini, D. J. *et al.* A mitochondrial protein compendium elucidates complex I disease biology. *Cell* **134**, 112-123, doi:10.1016/j.cell.2008.06.016 (2008).



- 17 Guo, X. *et al.* Ptc7p Dephosphorylates Select Mitochondrial Proteins to Enhance Metabolic Function. *Cell Rep* **18**, 307-313, doi:10.1016/j.celrep.2016.12.049 (2017).
- 18 Guo, X., Niemi, N. M., Coon, J. J. & Pagliarini, D. J. Integrative proteomics and biochemical analyses define Ptc6p as the *Saccharomyces cerevisiae* pyruvate dehydrogenase phosphatase. *J Biol Chem* **292**, 11751-11759, doi:10.1074/jbc.M117.787341 (2017).
- 19 Damuni, Z., Merryfield, M. L., Humphreys, J. S. & Reed, L. J. Purification and properties of branched-chain alpha-keto acid dehydrogenase phosphatase from bovine kidney. *Proc Natl Acad Sci U S A* **81**, 4335-4338 (1984).
- 20 Martin-Montalvo, A. *et al.* The phosphatase Ptc7 induces coenzyme Q biosynthesis by activating the hydroxylase Coq7 in yeast. *J Biol Chem* **288**, 28126-28137, doi:10.1074/jbc.M113.474494 (2013).
- 21 Awad, A. M. *et al.* Chromatin-remodeling SWI/SNF complex regulates coenzyme Q6 synthesis and a metabolic shift to respiration in yeast. *J Biol Chem* **292**, 14851-14866, doi:10.1074/jbc.M117.798397 (2017).
- 22 Yen, S. T. *et al.* Somatic mosaicism and allele complexity induced by CRISPR/Cas9 RNA injections in mouse zygotes. *Dev Biol* **393**, 3-9, doi:10.1016/j.ydbio.2014.06.017 (2014).
- 23 Girard, J., Ferre, P., Pegorier, J. P. & Duee, P. H. Adaptations of glucose and fatty acid metabolism during perinatal period and suckling-weaning transition. *Physiol Rev* **72**, 507-562, doi:10.1152/physrev.1992.72.2.507 (1992).
- 24 Hillman, N. H., Kallapur, S. G. & Jobe, A. H. Physiology of transition from intrauterine to extrauterine life. *Clin Perinatol* **39**, 769-783, doi:10.1016/j.clp.2012.09.009 (2012).
- 25 Wang, N. D. *et al.* Impaired energy homeostasis in C/EBP alpha knockout mice. *Science* **269**, 1108-1112 (1995).
- 26 Ibdah, J. A. *et al.* Lack of mitochondrial trifunctional protein in mice causes neonatal hypoglycemia and sudden death. *J Clin Invest* **107**, 1403-1409, doi:10.1172/JCI12590 (2001).
- 27 Cotter, D. G., d'Avignon, D. A., Wentz, A. E., Weber, M. L. & Crawford, P. A. Obligate role for ketone body oxidation in neonatal metabolic homeostasis. *J Biol Chem* **286**, 6902-6910, doi:10.1074/jbc.M110.192369 (2011).
- 28 Vafai, S. B. & Mootha, V. K. Mitochondrial disorders as windows into an ancient organelle. *Nature* **491**, 374-383, doi:10.1038/nature11707 (2012).
- 29 Rinaldo, P., Matern, D. & Bennett, M. J. Fatty acid oxidation disorders. *Annu Rev Physiol* **64**, 477-502, doi:10.1146/annurev.physiol.64.082201.154705 (2002).
- 30 Schuler, A. M. & Wood, P. A. Mouse models for disorders of mitochondrial fatty acid beta-oxidation. *ILAR J* **43**, 57-65 (2002).
- 31 Maaswinkel-Mooij, P. D. *et al.* Depletion of mitochondrial DNA in the liver of a patient with lactic acidemia and hypoketotic hypoglycemia. *J Pediatr* **128**, 679-683 (1996).
- 32 Przyrembel, H. *et al.* Glutaric aciduria type II: report on a previously undescribed metabolic disorder. *Clin Chim Acta* **66**, 227-239 (1976).
- 33 Vockley, J., Rinaldo, P., Bennett, M. J., Matern, D. & Vladutiu, G. D. Synergistic heterozygosity: disease resulting from multiple partial defects in one or more metabolic pathways. *Mol Genet Metab* **71**, 10-18, doi:10.1006/mgme.2000.3066 (2000).
- 34 Ney, P. A. Mitochondrial autophagy: Origins, significance, and role of BNIP3 and NIX. *Biochim Biophys Acta* **1853**, 2775-2783, doi:10.1016/j.bbamcr.2015.02.022 (2015).



- 35 Geissler, A. *et al.* The mitochondrial presequence translocase: an essential role of Tim50 in directing preproteins to the import channel. *Cell* **111**, 507-518 (2002).
- 36 Dickinson, M. E. *et al.* High-throughput discovery of novel developmental phenotypes. *Nature* **537**, 508-514, doi:10.1038/nature19356 (2016).
- 37 Reyes, A. *et al.* Mutations in TIMM50 compromise cell survival in OxPhos-dependent metabolic conditions. *EMBO Mol Med*, doi:10.15252/emmm.201708698 (2018).
- 38 Yamamoto, H. *et al.* Tim50 is a subunit of the TIM23 complex that links protein translocation across the outer and inner mitochondrial membranes. *Cell* **111**, 519-528 (2002).
- 39 Ting, S. Y., Yan, N. L., Schilke, B. A. & Craig, E. A. Dual interaction of scaffold protein Tim44 of mitochondrial import motor with channel-forming translocase subunit Tim23. *Elife* **6**, doi:10.7554/eLife.23609 (2017).
- 40 Weidberg, H. & Amon, A. MitoCPR-A surveillance pathway that protects mitochondria in response to protein import stress. *Science* **360**, doi:10.1126/science.aan4146 (2018).
- 41 Wiedemann, N., Frazier, A. E. & Pfanner, N. The protein import machinery of mitochondria. *J Biol Chem* **279**, 14473-14476, doi:10.1074/jbc.R400003200 (2004).
- 42 Calvo, S. E. *et al.* Comparative Analysis of Mitochondrial N-Termini from Mouse, Human, and Yeast. *Mol Cell Proteomics* **16**, 512-523, doi:10.1074/mcp.M116.063818 (2017).
- 43 Rhee, H. W. *et al.* Proteomic mapping of mitochondria in living cells via spatially restricted enzymatic tagging. *Science* **339**, 1328-1331, doi:10.1126/science.1230593 (2013).
- 44 Baumgartner M.R., V. D., and C. Dionisi-Vici. in *Inborn Metabolic Diseases* (ed J.-M. Saudubray) Ch. 21, 321-331 (Springer-Verlag, 2016).
- 45 El-Hattab, A. W. Inborn errors of metabolism. *Clin Perinatol* **42**, 413-439, x, doi:10.1016/j.clp.2015.02.010 (2015).
- 46 Kanehisa, M., Sato, Y., Kawashima, M., Furumichi, M. & Tanabe, M. KEGG as a reference resource for gene and protein annotation. *Nucleic Acids Res* **44**, D457-462, doi:10.1093/nar/gkv1070 (2016).
- 47 Oza, J. P. *et al.* Robust production of recombinant phosphoproteins using cell-free protein synthesis. *Nat Commun* **6**, 8168, doi:10.1038/ncomms9168 (2015).
- 48 Pirman, N. L. *et al.* A flexible codon in genomically recoded *Escherichia coli* permits programmable protein phosphorylation. *Nat Commun* **6**, 8130, doi:10.1038/ncomms9130 (2015).
- 49 Stojanovski, D., Pfanner, N. & Wiedemann, N. Import of proteins into mitochondria. *Methods Cell Biol* **80**, 783-806, doi:10.1016/S0091-679X(06)80036-1 (2007).
- 50 Murakami, H., Pain, D. & Blobel, G. 70-kD heat shock-related protein is one of at least two distinct cytosolic factors stimulating protein import into mitochondria. *J Cell Biol* **107**, 2051-2057 (1988).
- 51 Hachiya, N. *et al.* MSF, a novel cytoplasmic chaperone which functions in precursor targeting to mitochondria. *EMBO J* **13**, 5146-5154 (1994).
- 52 Mossmann, D. *et al.* Amyloid-beta peptide induces mitochondrial dysfunction by inhibition of preprotein maturation. *Cell Metab* **20**, 662-669, doi:10.1016/j.cmet.2014.07.024 (2014).

- 53 Mukhopadhyay, A., Yang, C. S., Wei, B. & Weiner, H. Precursor protein is readily degraded in mitochondrial matrix space if the leader is not processed by mitochondrial processing peptidase. *J Biol Chem* **282**, 37266-37275, doi:10.1074/jbc.M706594200 (2007).
- 54 Schatton, D. *et al.* CLUH regulates mitochondrial metabolism by controlling translation and decay of target mRNAs. *J Cell Biol* **216**, 675-693, doi:10.1083/jcb.201607019 (2017).
- 55 Schmidt, O. *et al.* Regulation of mitochondrial protein import by cytosolic kinases. *Cell* **144**, 227-239, doi:10.1016/j.cell.2010.12.015 (2011).
- 56 Rao, S. *et al.* Biogenesis of the preprotein translocase of the outer mitochondrial membrane: protein kinase A phosphorylates the precursor of Tom40 and impairs its import. *Mol Biol Cell* **23**, 1618-1627, doi:10.1091/mbc.E11-11-0933 (2012).
- 57 Gerbeth, C. *et al.* Glucose-induced regulation of protein import receptor Tom22 by cytosolic and mitochondria-bound kinases. *Cell Metab* **18**, 578-587, doi:10.1016/j.cmet.2013.09.006 (2013).
- 58 Harbauer, A. B. *et al.* Mitochondria. Cell cycle-dependent regulation of mitochondrial preprotein translocase. *Science* **346**, 1109-1113, doi:10.1126/science.1261253 (2014).
- 59 Acin-Perez, R. *et al.* Cyclic AMP produced inside mitochondria regulates oxidative phosphorylation. *Cell Metab* **9**, 265-276, doi:10.1016/j.cmet.2009.01.012 (2009).
- 60 Fang, J. K. *et al.* Site specific phosphorylation of cytochrome c oxidase subunits I, IVi1 and Vb in rabbit hearts subjected to ischemia/reperfusion. *FEBS Lett* **581**, 1302-1310, doi:10.1016/j.febslet.2007.02.042 (2007).
- 61 Lefkimiatis, K., Leroni, D. & Hofer, A. M. The inner and outer compartments of mitochondria are sites of distinct cAMP/PKA signaling dynamics. *J Cell Biol* **202**, 453-462, doi:10.1083/jcb.201303159 (2013).
- 62 May, T. & Soll, J. 14-3-3 proteins form a guidance complex with chloroplast precursor proteins in plants. *Plant Cell* **12**, 53-64 (2000).
- 63 Waegemann, K. & Soll, J. Phosphorylation of the transit sequence of chloroplast precursor proteins. *J Biol Chem* **271**, 6545-6554 (1996).
- 64 Robin, M. A., Prabu, S. K., Raza, H., Anandatheerthavarada, H. K. & Avadhani, N. G. Phosphorylation enhances mitochondrial targeting of GSTA4-4 through increased affinity for binding to cytoplasmic Hsp70. *J Biol Chem* **278**, 18960-18970, doi:10.1074/jbc.M301807200 (2003).
- 65 Anandatheerthavarada, H. K., Sepuri, N. B. & Avadhani, N. G. Mitochondrial targeting of cytochrome P450 proteins containing NH<sub>2</sub>-terminal chimeric signals involves an unusual TOM20/TOM22 bypass mechanism. *J Biol Chem* **284**, 17352-17363, doi:10.1074/jbc.M109.007492 (2009).
- 66 Lee, J., O'Neill, R. C., Park, M. W., Gravel, M. & Braun, P. E. Mitochondrial localization of CNP2 is regulated by phosphorylation of the N-terminal targeting signal by PKC: implications of a mitochondrial function for CNP2 in glial and non-glial cells. *Mol Cell Neurosci* **31**, 446-462, doi:10.1016/j.mcn.2005.10.017 (2006).
- 67 Zhao, X. *et al.* Phosphoproteome analysis of functional mitochondria isolated from resting human muscle reveals extensive phosphorylation of inner membrane protein complexes and enzymes. *Mol Cell Proteomics* **10**, M110 000299, doi:10.1074/mcp.M110.000299 (2011).

- 68 Chung, J. *et al.* Erythropoietin signaling regulates heme biosynthesis. *Elife* **6**, doi:10.7554/eLife.24767 (2017).
- 69 De Rasmio, D., Panelli, D., Sardanelli, A. M. & Papa, S. cAMP-dependent protein kinase regulates the mitochondrial import of the nuclear encoded NDUFS4 subunit of complex I. *Cell Signal* **20**, 989-997, doi:10.1016/j.cellsig.2008.01.017 (2008).
- 70 Wang, L. *et al.* Cloning and mitochondrial localization of full-length D-AKAP2, a protein kinase A anchoring protein. *Proc Natl Acad Sci U S A* **98**, 3220-3225, doi:10.1073/pnas.051633398 (2001).
- 71 Alam, R. *et al.* cDNA cloning and characterization of mitochondrial import stimulation factor (MSF) purified from rat liver cytosol. *J Biochem* **116**, 416-425 (1994).
- 72 Komiya, T., Hachiya, N., Sakaguchi, M., Omura, T. & Mihara, K. Recognition of mitochondria-targeting signals by a cytosolic import stimulation factor, MSF. *J Biol Chem* **269**, 30893-30897 (1994).
- 73 Johnson, C. *et al.* Visualization and biochemical analyses of the emerging mammalian 14-3-3-phosphoproteome. *Mol Cell Proteomics* **10**, M110 005751, doi:10.1074/mcp.M110.005751 (2011).
- 74 La, P., Yang, G. & Dennerly, P. A. Mammalian target of rapamycin complex 1 (mTORC1)-mediated phosphorylation stabilizes ISCU protein: implications for iron metabolism. *J Biol Chem* **288**, 12901-12909, doi:10.1074/jbc.M112.424499 (2013).
- 75 Horn, H. *et al.* KinomeXplorer: an integrated platform for kinome biology studies. *Nat Methods* **11**, 603-604, doi:10.1038/nmeth.2968 (2014).
- 76 Kerk, D., Silver, D., Uhrig, R. G. & Moorhead, G. B. "PP2C7s", Genes Most Highly Elaborated in Photosynthetic Organisms, Reveal the Bacterial Origin and Stepwise Evolution of PPM/PP2C Protein Phosphatases. *PLoS One* **10**, e0132863, doi:10.1371/journal.pone.0132863 (2015).
- 77 Chen, M. J., Dixon, J. E. & Manning, G. Genomics and evolution of protein phosphatases. *Sci Signal* **10**, doi:10.1126/scisignal.aag1796 (2017).
- 78 Duncan, M. R., Fullerton, M. & Chaudhuri, M. Tim50 in *Trypanosoma brucei* possesses a dual specificity phosphatase activity and is critical for mitochondrial protein import. *J Biol Chem* **288**, 3184-3197, doi:10.1074/jbc.M112.436378 (2013).
- 79 Lombard, D. B. *et al.* Mammalian Sir2 homolog SIRT3 regulates global mitochondrial lysine acetylation. *Mol Cell Biol* **27**, 8807-8814, doi:10.1128/MCB.01636-07 (2007).
- 80 Yu, J. *et al.* Metabolic characterization of a Sirt5 deficient mouse model. *Sci Rep* **3**, 2806, doi:10.1038/srep02806 (2013).
- 81 Veling, M. T. *et al.* Multi-omic Mitoprotease Profiling Defines a Role for Oct1p in Coenzyme Q Production. *Mol Cell* **68**, 970-977 e911, doi:10.1016/j.molcel.2017.11.023 (2017).
- 82 Stefely, J. A. *et al.* Mitochondrial protein functions elucidated by multi-omic mass spectrometry profiling. *Nat Biotechnol* **34**, 1191-1197, doi:10.1038/nbt.3683 (2016).
- 83 Linstrom, J. NIST Standard Reference Database Number 69. (2014).
- 84 Hutchins, P. D., Russell, J. D. & Coon, J. J. LipiDex: An Integrated Software Package for High-Confidence Lipid Identification. *Cell Syst* **6**, 621-625 e625, doi:10.1016/j.cels.2018.03.011 (2018).

- 85 Fernandez, M., Mano, S., de Fernando, D. G., Ordonez, J. A. & Hoz, L. Use of beta-hydroxyacyl-CoA-dehydrogenase (HADH) activity to differentiate frozen from unfrozen fish and shellfish. *Eur Food Res Technol* **209**, 205-208, doi:DOI 10.1007/s002170050481 (1999).
- 86 Hebert, A. S. *et al.* The one hour yeast proteome. *Mol Cell Proteomics* **13**, 339-347, doi:10.1074/mcp.M113.034769 (2014).
- 87 Riley, N. M. *et al.* Phosphoproteomics with Activated Ion Electron Transfer Dissociation. *Anal Chem* **89**, 6367-6376, doi:10.1021/acs.analchem.7b00212 (2017).
- 88 Geer, L. Y. *et al.* Open mass spectrometry search algorithm. *J Proteome Res* **3**, 958-964, doi:10.1021/pr0499491 (2004).
- 89 Wenger, C. D., Phanstiel, D. H., Lee, M. V., Bailey, D. J. & Coon, J. J. COMPASS: a suite of pre- and post-search proteomics software tools for OMSSA. *Proteomics* **11**, 1064-1074, doi:10.1002/pmic.201000616 (2011).
- 90 Taus, T. *et al.* Universal and confident phosphorylation site localization using phosphoRS. *J Proteome Res* **10**, 5354-5362, doi:10.1021/pr200611n (2011).
- 91 Meisinger, C., Pfanner, N. & Truscott, K. N. Isolation of yeast mitochondria. *Methods Mol Biol* **313**, 33-39, doi:10.1385/1-59259-958-3:033 (2006).
- 92 Johnston, A. J. *et al.* Insertion and assembly of human tom7 into the preprotein translocase complex of the outer mitochondrial membrane. *J Biol Chem* **277**, 42197-42204, doi:10.1074/jbc.M205613200 (2002).
- 93 Kwon, Y. C. & Jewett, M. C. High-throughput preparation methods of crude extract for robust cell-free protein synthesis. *Sci Rep* **5**, 8663, doi:10.1038/srep08663 (2015).
- 94 Caschera, F. & Noireaux, V. Preparation of amino acid mixtures for cell-free expression systems. *Biotechniques* **58**, 40-43, doi:10.2144/000114249 (2015).
- 95 Floyd, B. J. *et al.* Mitochondrial Protein Interaction Mapping Identifies Regulators of Respiratory Chain Function. *Mol Cell* **63**, 621-632, doi:10.1016/j.molcel.2016.06.033 (2016).

## FIGURES

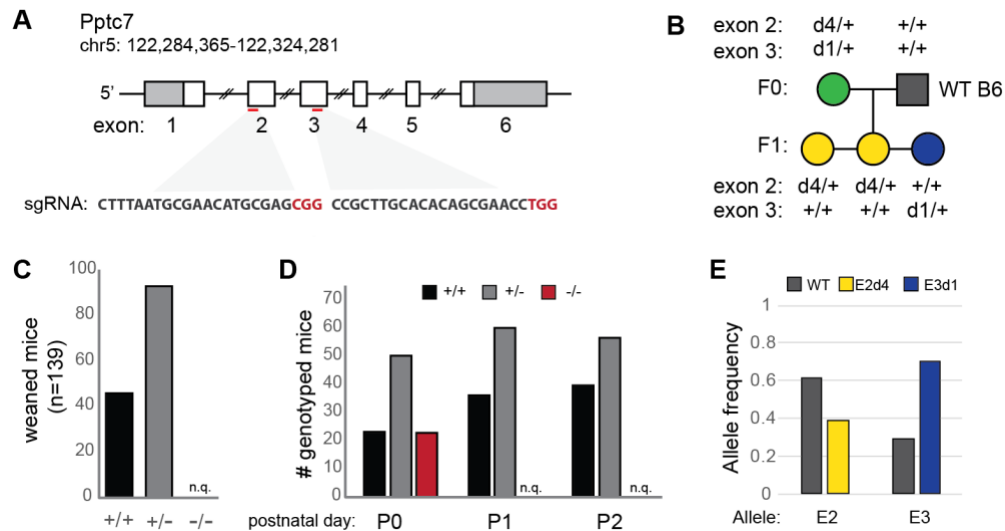

**Figure 1: Global, CRISPR-mediated knockout of *Pptc7* causes perinatal lethality. A.**

Targeting strategy for the *Pptc7* locus in *Mus musculus* is shown; two sgRNAs were designed to exons 2 and 3 and injected simultaneously into 1 cell zygotes. B. The founder mouse was bred to a wild type C57B6/J mouse, generating F1 pups containing deletions (labeled dX where X is number of base pairs deleted) in exon 2 (yellow) or exon 3 (blue). This segregation pattern indicates the founder mouse is compound heterozygous (null) for *Pptc7*. C. No *Pptc7* knockout pups were found at weaning (n=139). D. *Pptc7* knockout pups are born at Mendelian frequencies, but no live pups were found at postnatal day 1 (P1) or day 2 (P2) (reported as n.q. – not quantified). E. Allele frequency in skeletal muscle of the F0 founder mouse, demonstrating mosaicism.

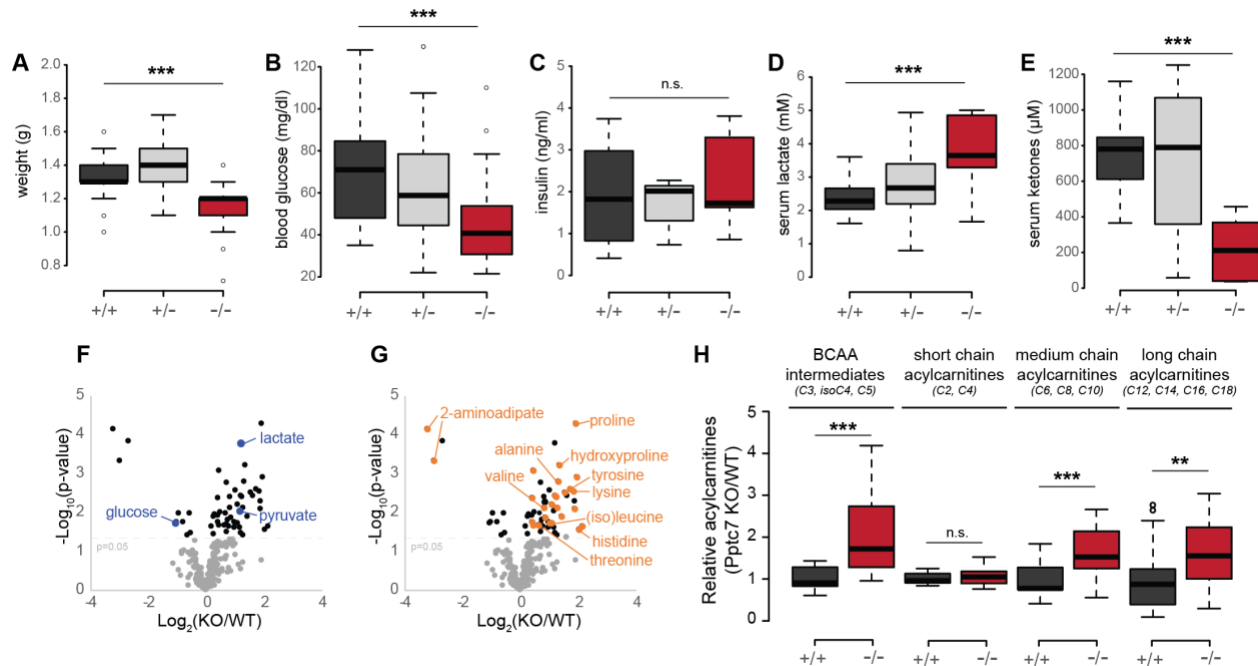

**Figure 2: *Pptc7*-null mice have defects associated with inborn errors of metabolism.** A. *Pptc7* KO perinatal pups (P0, red, n=46) weigh significantly less than wild type (dark gray, n=47) and heterozygous (light gray, n=102) littermates. B. *Pptc7* KO pups (n=28) are hypoglycemic relative to WT (n=41) and heterozygous (n=82) littermates. C. *Pptc7* KO pups (n=10) show no difference in circulating insulin relative to WT (n=8) and heterozygous (n=5) littermates. D. *Pptc7* KO pups (n=7) have elevated serum lactate relative to WT (n=9) and heterozygous (n=22) littermates. E. *Pptc7* KO pups (n=6) have lower concentrations of serum ketones relative to WT (n=9) and heterozygous (n=13) pups. F. Metabolomics from liver tissues reveal decreased glucose and increased lactate and pyruvate in KO (n=5) samples relative to WT (n=5). G. Metabolomics from liver tissue (same data as shown in 2F) reveals numerous differences in amino acids and their intermediates in KO samples relative to WT. H. Acylcarnitine analysis of liver tissues from KO and WT. For each plot, n=7-8 independent replicates per genotype for each reported acylcarnitine species. For box plots in A.-E. and H., center lines show the medians; box limits indicate the 25th and 75th percentiles as determined

by R software; whiskers extend 1.5 times the interquartile range from the 25th and 75th percentiles, and outliers are represented by dots. Significance calculated by a two-tailed Student's t-test; \* =  $p < 0.05$ , \*\* =  $p < 0.01$ , \*\*\* =  $p < 0.001$ , n.s. = not significant.



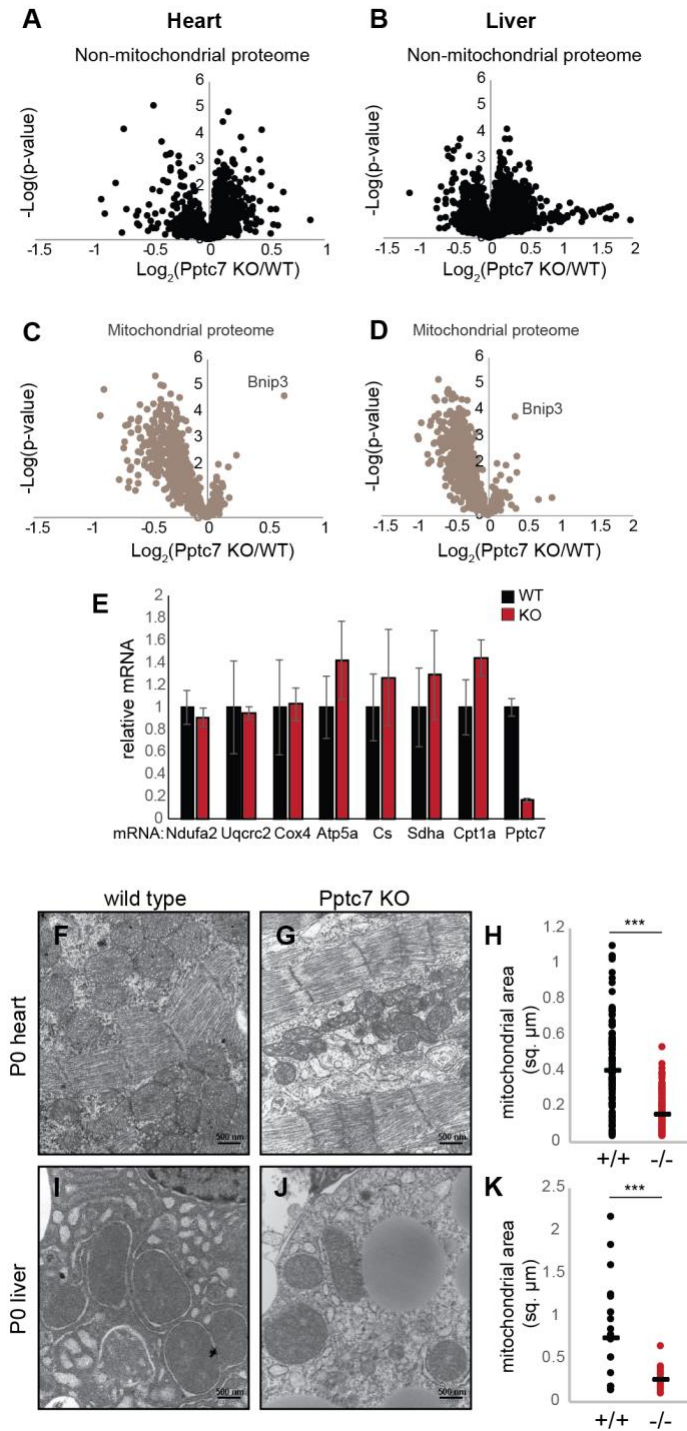

**Figure 3: Loss of Pptc7 selectively decreases mitochondrial content.** A-D. Volcano plots of non-mitochondrial (A, B) proteins and mitochondrial proteins (C, D) in both heart (A, C) and liver (B, D). One of the only significantly upregulated mitochondrial proteins is Bnip3, a protein



upregulated during organellar stress. E. qPCR of select nuclear-encoded mitochondrial targets from WT (black, n=4) or KO (red, n=3) heart tissue shows no significant decrease between genotypes, except for *Pptc7*. Error bars represent standard deviation; significance calculated with a two-tailed Student's t-test. F.-H. Transmission electron microscopy (TEM) was used to image heart tissue from WT (F.) and *Pptc7* KO (G.). Mitochondrial area was quantified in ImageJ (one dot = one mitochondrion) using the scale bar (500 nm). KO heart mitochondria are significantly smaller than those in WT tissues (H.). I.-K. TEM images of liver tissue from WT (I.) and *Pptc7* KO (J.) and analyzed as described for heart tissue. KO liver mitochondria are significantly smaller than WT mitochondria (K.). For H. and K., each dot represents the area of a single quantified mitochondrion in WT (black) or KO (red) tissues. The line represents the median area in each condition. Significance was calculated using a two-tailed Student's t-test; \*\*\* =  $p < 0.001$ .

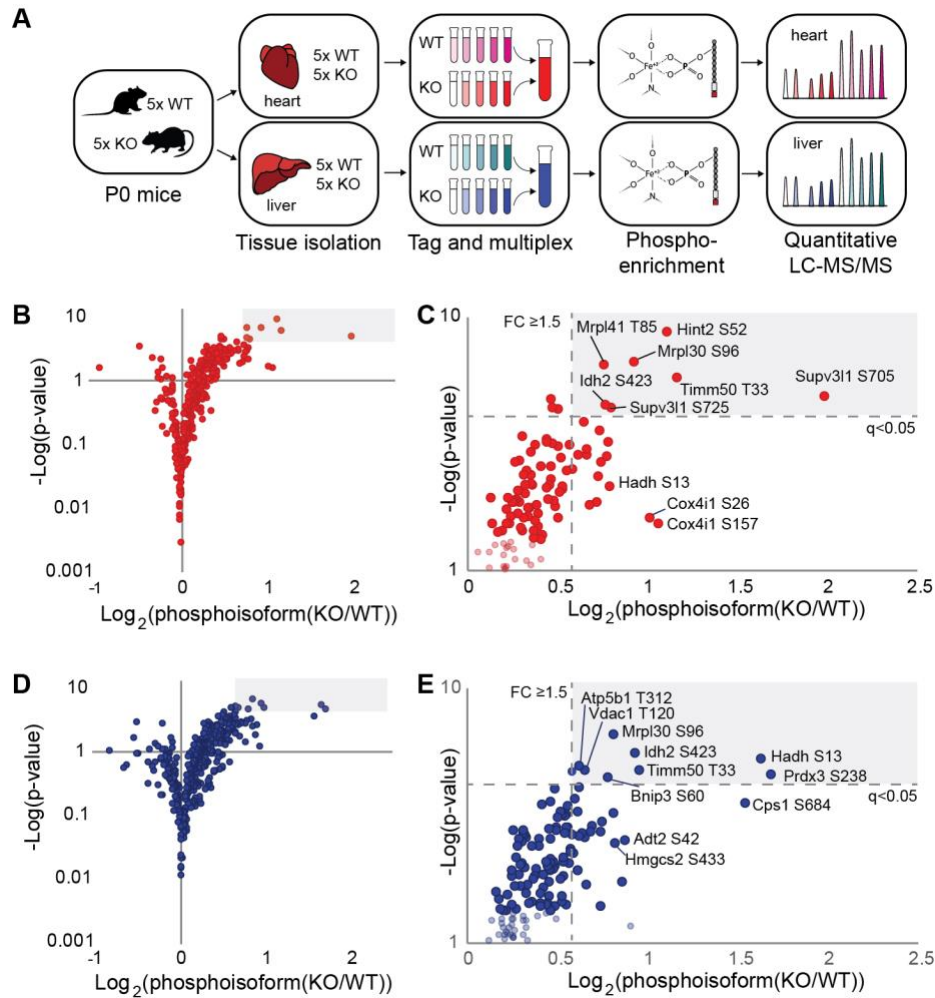

**Figure 4: Phosphoproteomic analysis reveals candidate Pptc7 substrates.** A. Schematic of multiplexed, quantitative phosphoproteomics for Pptc7 WT and KO heart (red) and liver (blue) tissues. B. Volcano plot showing mitochondrial phosphoisoforms as Log<sub>2</sub>(fold change) in Pptc7 KO versus WT heart. Shaded region corresponds to identified events with ≥1.5 fold change and a q-value of <0.05. D. Zoom in of shaded region in C. showing select statistically significant phosphoisoforms that are candidate Pptc7 substrates. D. Volcano plot showing mitochondrial phosphoisoforms as Log<sub>2</sub>(fold change) in Pptc7 KO versus WT liver. Shaded region corresponds to identified events with ≥1.5 fold change and a q-value of <0.05. E. Zoom in of

shaded region in D. showing select statistically significant phosphoisoforms that are candidate Pptc7 substrates.

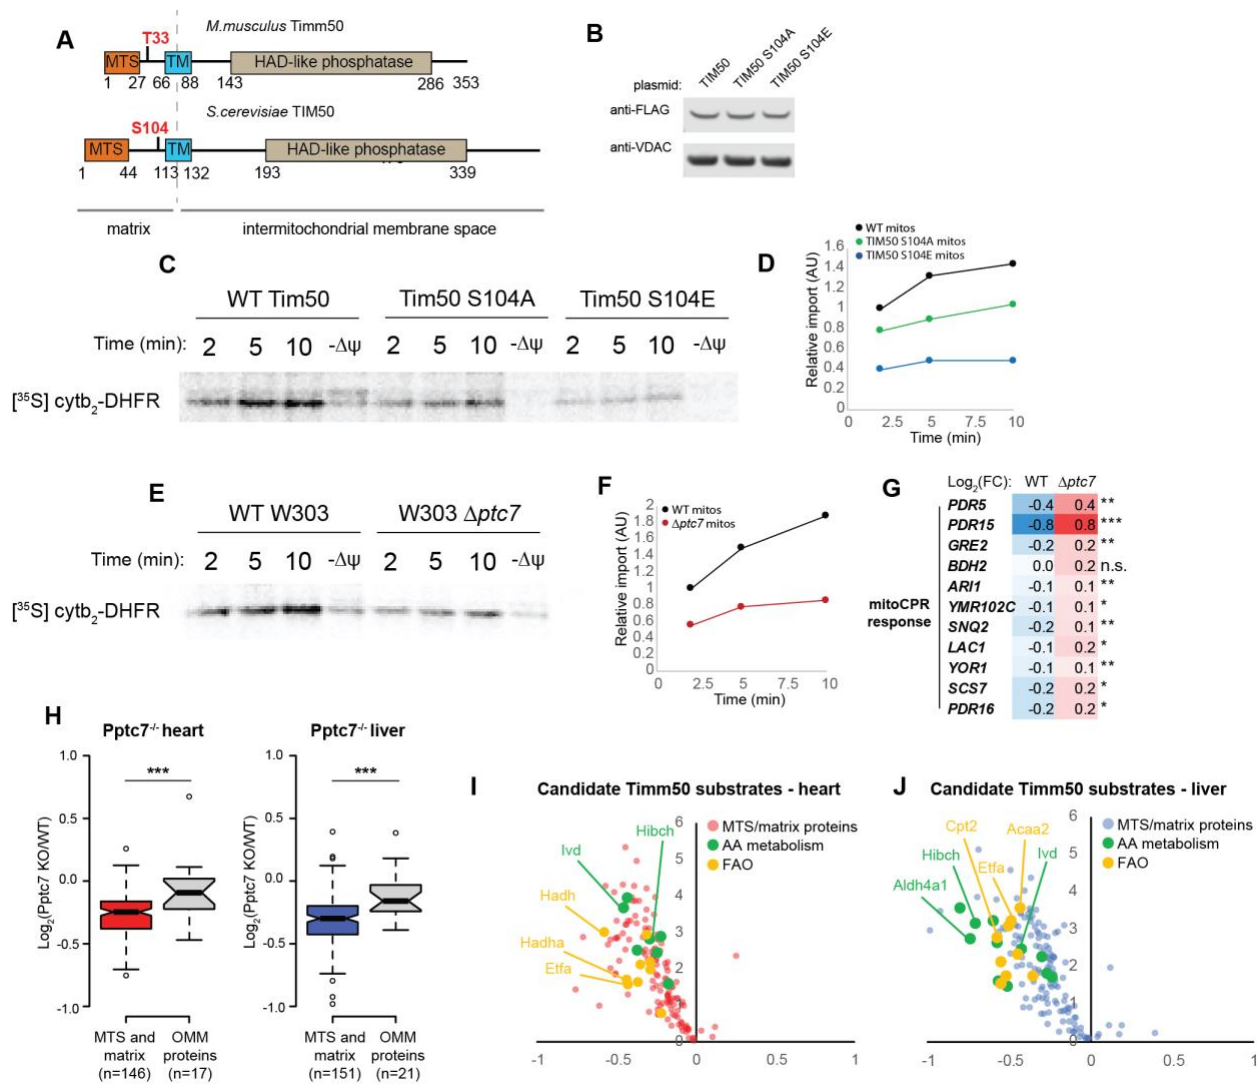

**Figure 5: Phosphorylation of the conserved Pptc7 substrate Timm50 decreases**

**mitochondrial protein import in yeast and mice.** A. Protein domain schematic of mouse Timm50 (top) and yeast TIM50 (bottom) with highlighted phosphoresidues (red). B. Western blot of overexpressed TIM50 WT, S104A, or S104E shows mutations do not destabilize proteins. C. Import assays in mitochondria isolated from *GAL7-TIM50* yeast overexpressing wild type (WT) TIM50 or S104 mutants using the generic import cargo cytochrome *b<sub>2</sub>-(167)<sub>Δ19</sub>-DHFR*. D. Quantification of import rates from (C.) E. Import assays in mitochondria isolated from WT or *Δptc7* yeast using the matrix-targeted model substrate cytochrome *b<sub>2</sub>-(167)<sub>Δ19</sub>-DHFR*. F.

Quantification of import rates from (E.). G. Proteomic analysis of WT and  $\Delta$ *ptc7* yeast show that loss of *ptc7* elevates 11 proteins associated with the mitoCPR response. H. Quantification of mitochondrial proteins in mouse heart (left) and mouse liver (right) showing significantly lower expression protein steady state levels of candidate Timm50 substrates (e.g. MTS and matrix-containing proteins) than select proteins that localize to the outer mitochondrial membrane (OMM). I., J. Volcano plots of candidate Timm50 substrates in heart (I.) and liver (J.) show downregulation of metabolic proteins in amino acid metabolism and fatty acid oxidation, both of which are disrupted in *Pptc7*-null tissues (Figure 2).

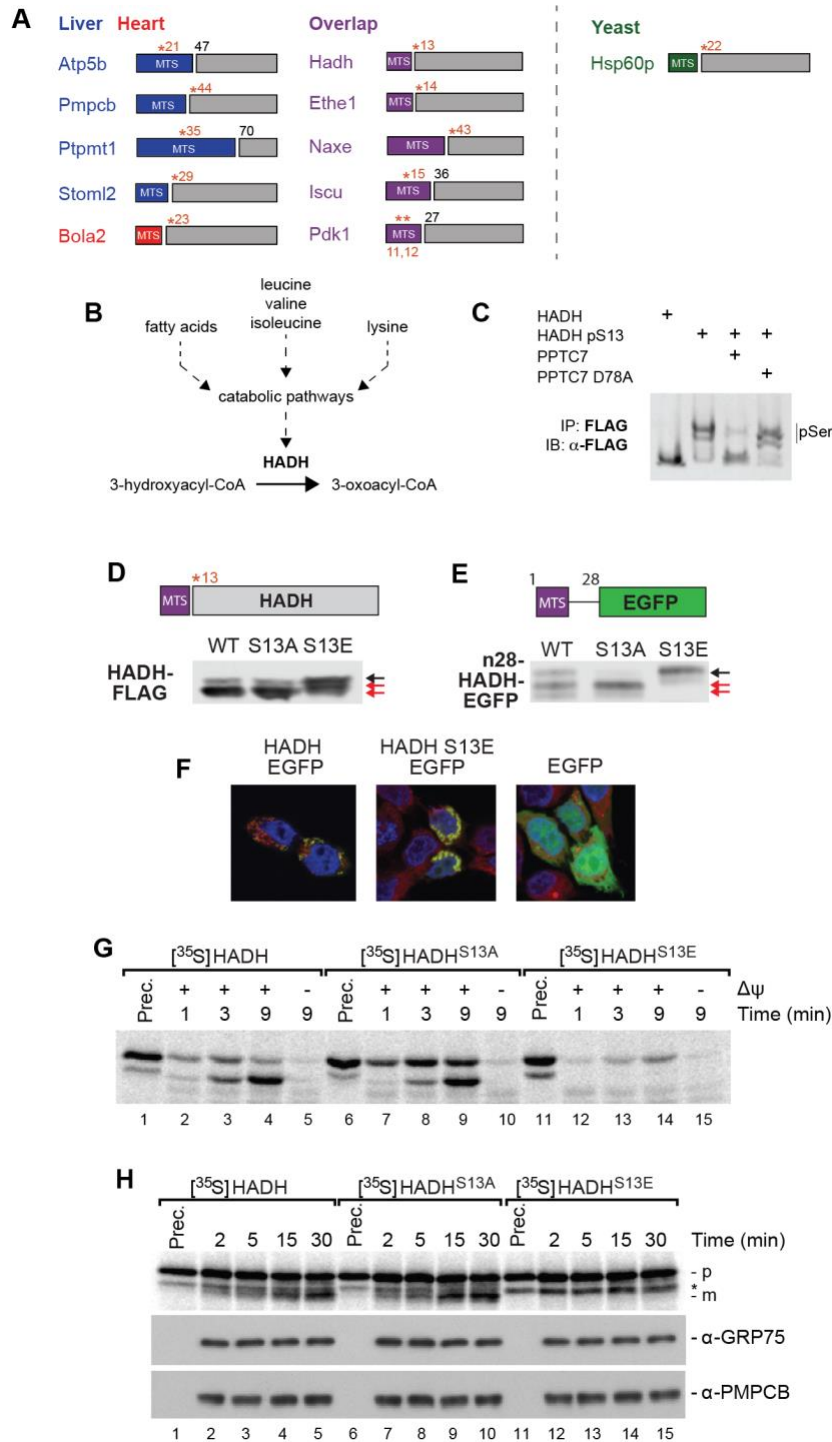

**Figure 6: Pptc7 influences mitochondrial protein import and processing through the dephosphorylation of MTS residues.** A. Candidate Pptc7 substrates phosphorylated within or proximal to their mitochondrial targeting sequence (MTS) identified in mouse heart (red), mouse

liver (blue), and Ptc7p-null yeast (green). B. Hadh is downstream of multiple metabolites dysregulated in Pptc7 knockout mice. C. Recombinant site-specific incorporated HADH pS13 can be dephosphorylated by recombinant PPTC7, but not a catalytically inactive mutant (D78A). D. Overexpression of WT, non-phosphorylatable (S13A) and phosphomimetic (S13E) HADH in 293 cells. S13E causes a shift in HADH processing relative to S13A and WT. E. A fusion protein of the first 28 amino acids of HADH and GFP was made, expressing WT or S13 mutants. S13E is sufficient to disrupt processing of the fusion protein. F. HADH and HADH S13E fusions overlap with MitoTracker Red staining, unlike EGFP with no targeting sequence. G. Import assays with recombinant 35S-labelled HADH, S13A, and S13E show that mutation of S13 alters HADH import efficiency into and processing in mitochondria isolated from HEK293T cells. Prec., precursor protein. H. MPP processing assay shows precursor HADH (p, top band) as well as cleavage into the mature form (m, bottom band) for both wild type and S13A HADH. Processing is completely disrupted in the S13E mutant, shown via the absence of the lowest band.\* is a non-specific band in all three conditions. GRP75 and PMPCB blots demonstrate equal loading.



## TABLES

| Protein | p-site | FC - liver | q - liver | FC - heart | q-heart | $\Delta ptc7$ | MitoMod |
|---------|--------|------------|-----------|------------|---------|---------------|---------|
| Timm50  | T33    | 1.95       | 0.035     | 2.25       | 0.003   | **            | **      |
| ldh2    | S423   | 1.91       | 0.014     | 1.71       | 0.033   | n.q.          | **      |
| Mrpl30  | S96    | 1.77       | 0.003     | 1.91       | 0.001   | n.q.          | ID      |
| Hadh    | S13    | 3.10       | 0.019     | 1.74       | 0.852   | n.q.          | **      |
| Prdx3   | S238   | 3.22       | 0.034     | n.q.       | n.q.    | n.q.          | ID      |
| Vdac1   | T120   | 1.58       | 0.031     | n.q.       | n.q.    | n.q.          | n.q.    |
| Atp5b1  | T312   | 1.54       | 0.029     | n.q.       | n.q.    | n.q.          | n.q.    |
| Bnip3   | S60    | 1.72       | 0.038     | 0.997      | 1.000   | n.q.          | **      |
| Mrpl41  | T85    | n.q.       | n.q.      | 1.7        | 0.001   | n.q.          | n.q.    |
| Hint2   | S52    | n.q.       | n.q.      | 2.17       | 0.000   | n.q.          | **      |
| Supv3l1 | S705   | n.q.       | n.q.      | 3.98       | 0.021   | n.q.          | n.q.    |
| Supv3l1 | S725   | 1.48       | 0.555     | 1.75       | 0.038   | n.q.          | ID      |
| Cs      | S225   | n.q.       | n.q.      | 1.45       | 0.843   | **            | ID      |
| Aco2    | S559   | 1.52       | 0.144     | 1.21       | 1.000   | **            | ID      |
| Etfa    | S140   | 1.27       | 0.678     | 1.29       | 1.000   | **            | **      |
| Hmgcs2  | S433   | 1.77       | 0.381     | n.q.       | n.q.    | n.q.          | **      |
| Adt2    | S42    | 1.84       | 0.368     | 1.45       | 0.920   | n.q.          | **      |

**Table 1: Select Pptc7 candidate substrates across liver, heart, and knockout yeast.**

Groups of phosphoisoforms shown by protein name and phosphosite identified (p-site), with relative fold changes (FC) and q-values (q) in heart and liver Pptc7 KO tissues. Identification of phosphoproteins in  $\Delta ptc7$  yeast<sup>17</sup> and in our previous study of obese mice (MitoMod)<sup>6</sup> also reported; \*\* = significantly changing; ID = identified; n.q. = not quantified. Proteins were catalogued into four groups: group 1 (top, white background) are significantly upregulated in both liver and heart KO tissues; group 2 (middle, grey background) are significantly upregulated in liver KO tissue; group 3 (middle, white background) are significantly upregulated in heart tissue; and group 4 (bottom, grey background) notable due to identification in other studies, including in  $\Delta ptc7$  yeast and MitoMod. Timm50 (top, yellow highlight) was significantly altered in both tissues and both previous studies, warranting biological follow up.
